# Supplementary material for: LSD 3.0: a comprehensive resource for the leaf senescence research community
Source: PubMed Central journal article supplement — Nucleic Acids Res. 2019 Oct 10;48(D1):D1069–75. doi: 10.1093/nar/gkz898 (PMC6943054; doi:10.1093/nar/gkz898), 2019-10-10
Supplement: gkz898_supplemental_file.pdf [file gkz898_supplemental_file.pdf]

Supplementary data

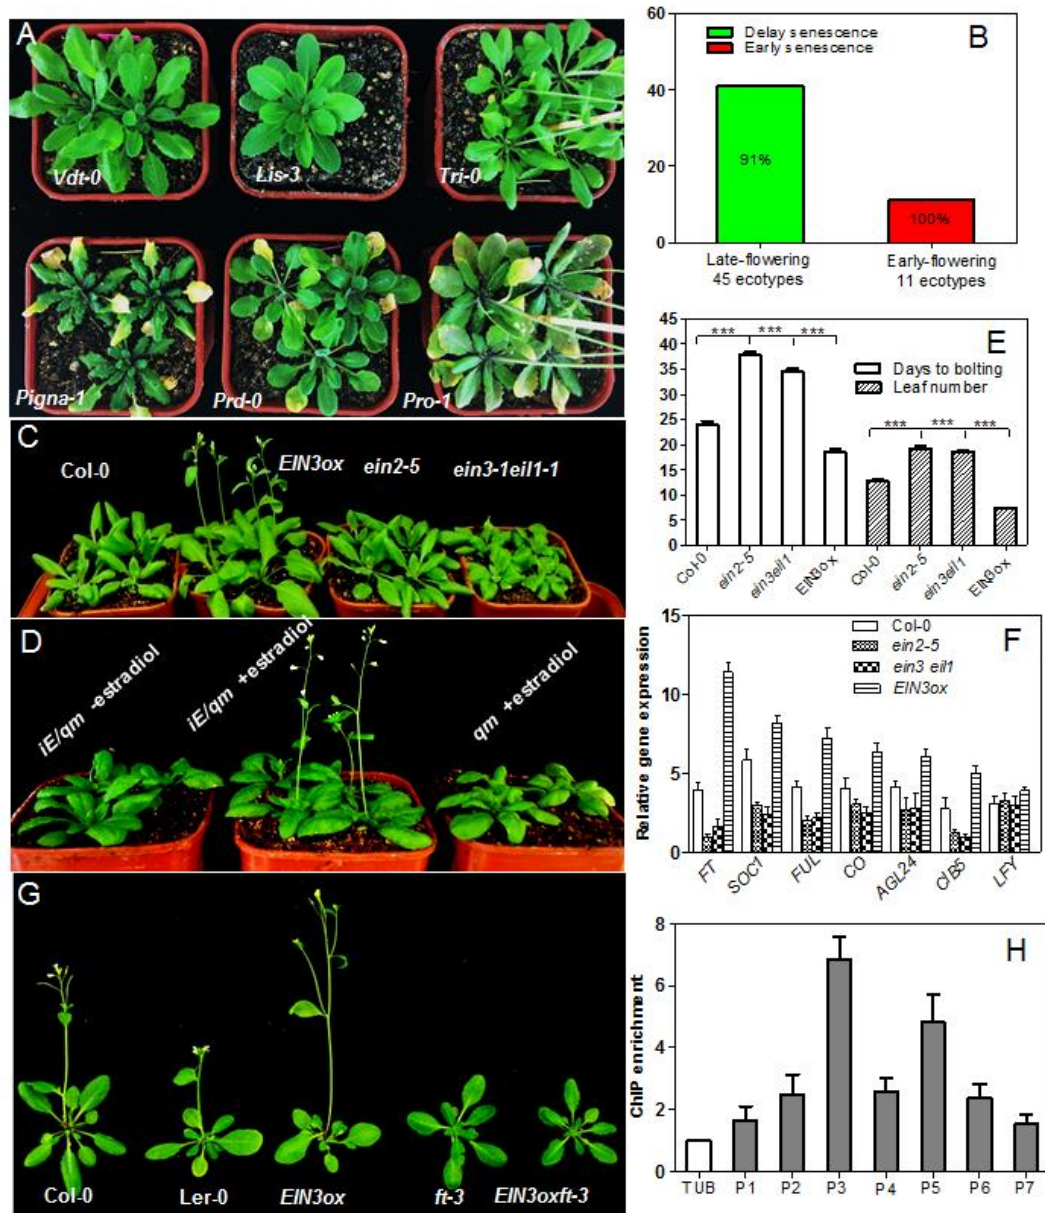

**Supplementary Figure 1.** Study on the relationship between senescence and flowering by using ecotypes and experimental analysis of the underlying mechanism via using genetic and biochemical data in *Arabidopsis*. (A-B) the senescence and flowering phenotypes of six ecotypes on long-day conditions (16 h light/8 h dark). (C-H) EIN3, a positive regulator of leaf senescence, induces early flowering by directly binding *FLOWERING LOCUS T* (*FT*) and increasing its expression (\*\*\*,  $P < 0.001$ ).

**Supplementary Table S1.** List of 617 mutants in LSD3.0.

| <b>Mutant</b>                                  | <b>Background</b>                       | <b>Mutagenesis type</b> | <b>Dominance</b> |
|------------------------------------------------|-----------------------------------------|-------------------------|------------------|
| <i>Asnodf32-silenced line</i>                  | <i>Astragalus sinicus L.</i>            | RNAi                    | recessive        |
| <i>MpSNAC67ox</i>                              | Banana ( <i>Musa x paradisiaca</i> )    | Transgene               | dominant         |
| <i>HvRBOHF2 KD plants</i>                      | Barley ( <i>Hordeum vulgare</i> )       | T-DNA                   | recessive        |
| <i>35S:BnLAS</i>                               | <i>Brassica napus</i>                   | Transgene               | dominant         |
| <i>35S-BrANT-1</i>                             | <i>Brassica rapa var. parachinensis</i> | Transgene               | dominant         |
| <i>rpn10-1</i>                                 | <i>Arabidopsis thaliana</i>             | T-DNA                   | recessive        |
| <i>sweetie</i>                                 | <i>Arabidopsis thaliana</i>             | T-DNA                   | recessive        |
| <i>p35S::CmBBX22</i>                           | Chrysanthemum                           | Transgene               | dominant         |
| <i>abf2abf3abf4</i>                            | <i>Arabidopsis thaliana</i>             | cross                   | recessive        |
| <i>abig1-1</i>                                 | <i>Arabidopsis thaliana</i>             | T-DNA                   | recessive        |
| <i>chmp7-2, SALK_0071371C</i>                  | <i>Arabidopsis thaliana</i>             | T-DNA                   | recessive        |
| <i>psan-2</i>                                  | <i>Arabidopsis thaliana</i>             | T-DNA                   | recessive        |
| <i>pyl9</i>                                    | <i>Arabidopsis thaliana</i>             | T-DNA                   | recessive        |
| <i>pyr1pyl1/2/3/4/5/7/8/9/10/11/12</i>         | <i>Arabidopsis thaliana</i>             | cross                   | recessive        |
| <i>rrt1</i>                                    | <i>Arabidopsis thaliana</i>             | T-DNA                   | recessive        |
| <i>SINAP1-KD</i>                               | <i>Arabidopsis thaliana</i>             | T-DNA                   | recessive        |
| <i>SINAP1-OE</i>                               | <i>Arabidopsis thaliana</i>             | Transgene               | dominant         |
| <i>SRT1.RNAi</i>                               | <i>Arabidopsis thaliana</i>             | RNAi                    | recessive        |
| <i>vps35b-2(SALK_038926)</i>                   | <i>Arabidopsis thaliana</i>             | T-DNA                   | dominant         |
| <i>2/per OxyR-RD-cpYFP overexpressing line</i> | <i>Arabidopsis thaliana</i>             | Transgene               | dominant         |
| <i>2x35S-UBA2a-OX</i>                          | <i>Arabidopsis thaliana</i>             | Transgene               | dominant         |
| <i>35S-JUB1</i>                                | <i>Arabidopsis thaliana</i>             | Transgene               | dominant         |
| <i>35S-NOL-GFP</i>                             | <i>Arabidopsis thaliana</i>             | Transgene               | dominant         |
| <i>35S-NYC1-GFP</i>                            | <i>Arabidopsis thaliana</i>             | Transgene               | dominant         |
| <i>35S-PAO-GFP</i>                             | <i>Arabidopsis thaliana</i>             | Transgene               | dominant         |
| <i>35S-PAS2:GFP overexpression line</i>        | <i>Arabidopsis thaliana</i>             | Transgene               | dominant         |
| <i>35S-PPH-GFP</i>                             | <i>Arabidopsis thaliana</i>             | Transgene               | dominant         |
| <i>35S-RCCR-GFP</i>                            | <i>Arabidopsis thaliana</i>             | Transgene               | dominant         |
| <i>35S-SGR-GFP</i>                             | <i>Arabidopsis thaliana</i>             | Transgene               | dominant         |
| <i>35S::9 deltaC Transgene plant</i>           | <i>Arabidopsis thaliana</i>             | Transgene               | dominant         |
| <i>35S::CaM1-GFP</i>                           | <i>Arabidopsis thaliana</i>             | Transgene               | dominant         |
| <i>35S::DEAR1</i>                              | <i>Arabidopsis thaliana</i>             | Transgene               | dominant         |
| <i>35S:ANAC092</i>                             | <i>Arabidopsis thaliana</i>             | Transgene               | dominant         |
| <i>35S:ATAF1/anac092-1</i>                     | <i>Arabidopsis thaliana</i>             | Transgene               | dominant         |
| <i>35S:ATAF1/Col-0</i>                         | <i>Arabidopsis thaliana</i>             | Transgene               | dominant         |
| <i>35S:AtB11</i>                               | <i>Arabidopsis thaliana</i>             | Transgene               | dominant         |
| <i>35S:AtLrgB</i>                              | <i>Arabidopsis thaliana</i>             | Transgene               | dominant         |
| <i>35S:BB</i>                                  | <i>Arabidopsis thaliana</i>             | Transgene               | dominant         |
| <i>35S:CAT2</i>                                | <i>Arabidopsis thaliana</i>             | Transgene               | dominant         |
| <i>35S:COR15A</i>                              | <i>Arabidopsis thaliana</i>             | Transgene               | dominant         |
| <i>35S:COR15B</i>                              | <i>Arabidopsis thaliana</i>             | Transgene               | dominant         |

|                                                   |                             |           |           |
|---------------------------------------------------|-----------------------------|-----------|-----------|
| 35S:CRS                                           | <i>Arabidopsis thaliana</i> | Transgene | dominant  |
| 35S:FT soc1-3 ful-2                               | <i>Arabidopsis thaliana</i> | cross     | recessive |
| 35S:FYF                                           | <i>Arabidopsis thaliana</i> | Transgene | dominant  |
| 35S:GLK1                                          | <i>Arabidopsis thaliana</i> | Transgene | dominant  |
| 35S:GLK2                                          | <i>Arabidopsis thaliana</i> | Transgene | dominant  |
| 35S:GRF5                                          | <i>Arabidopsis thaliana</i> | Transgene | dominant  |
| 35S:MAPKKK18                                      | <i>Arabidopsis thaliana</i> | Transgene | dominant  |
| 35S:MAPKKK18KN                                    | <i>Arabidopsis thaliana</i> | Transgene | dominant  |
| 35S:MKK9                                          | <i>Arabidopsis thaliana</i> | Transgene | dominant  |
| 35S:MKK9mpk6                                      | <i>Arabidopsis thaliana</i> | cross     | dominant  |
| 35S:NTL4deltaC plants                             | <i>Arabidopsis thaliana</i> | Transgene | dominant  |
| 35S:ORE1                                          | <i>Arabidopsis thaliana</i> | Transgene | dominant  |
| 35S:ORE1/35S:GLK2                                 | <i>Arabidopsis thaliana</i> | Transgene | dominant  |
| 35S:ORS1                                          | <i>Arabidopsis thaliana</i> | Transgene | dominant  |
| 35S:PVA31                                         | <i>Arabidopsis thaliana</i> | Transgene | dominant  |
| 35S:RD29A                                         | <i>Arabidopsis thaliana</i> | Transgene | dominant  |
| 35S:RD29B                                         | <i>Arabidopsis thaliana</i> | Transgene | dominant  |
| 35S:RPN5a                                         | <i>Arabidopsis thaliana</i> | Transgene | dominant  |
| 35S:RPN5b                                         | <i>Arabidopsis thaliana</i> | Transgene | dominant  |
| 35S:SAG29                                         | <i>Arabidopsis thaliana</i> | Transgene | dominant  |
| 35S:SSPP                                          | <i>Arabidopsis thaliana</i> | Transgene | dominant  |
| 35S:VNI2                                          | <i>Arabidopsis thaliana</i> | Transgene | dominant  |
| 35S:YUC6                                          | <i>Arabidopsis thaliana</i> | Transgene | dominant  |
| 8/cyt OxyR-RD-cpYFP                               | <i>Arabidopsis thaliana</i> | Transgene | dominant  |
| aaf-KO                                            | <i>Arabidopsis thaliana</i> | T-DNA     | recessive |
| AAF-OX                                            | <i>Arabidopsis thaliana</i> | Transgene | dominant  |
| AAF-OXein2-5                                      | <i>Arabidopsis thaliana</i> | cross     | NA        |
| aba2-1                                            | <i>Arabidopsis thaliana</i> | EMS       | recessive |
| abc1k7 (SALK_020431)                              | <i>Arabidopsis thaliana</i> | T-DNA     | recessive |
| abc1k7 abc1k78                                    | <i>Arabidopsis thaliana</i> | T-DNA     | recessive |
| abc1k78 (GABI_132G06)                             | <i>Arabidopsis thaliana</i> | T-DNA     | recessive |
| acbp3                                             | <i>Arabidopsis thaliana</i> | T-DNA     | recessive |
| ACBP3-GFP                                         | <i>Arabidopsis thaliana</i> | Transgene | dominant  |
| ACBP3-RNAi                                        | <i>Arabidopsis thaliana</i> | RNAi      | recessive |
| ACBP3deltaSS-GFP                                  | <i>Arabidopsis thaliana</i> | Transgene | recessive |
| ACBP3OE                                           | <i>Arabidopsis thaliana</i> | Transgene | dominant  |
| acd1/pao                                          | <i>Arabidopsis thaliana</i> | EMS       | recessive |
| acd2                                              | <i>Arabidopsis thaliana</i> | EMS       | recessive |
| acs2-1acs4-1acs5-2acs6-1acs7-1acs9-1amiRacs8acs11 | <i>Arabidopsis thaliana</i> | cross     | recessive |
| ACS6DDD                                           | <i>Arabidopsis thaliana</i> | Transgene | dominant  |
| agb1-2                                            | <i>Arabidopsis thaliana</i> | T-DNA     | recessive |
| ahk2-2                                            | <i>Arabidopsis thaliana</i> | T-DNA     | recessive |
| ahk2-5                                            | <i>Arabidopsis thaliana</i> | T-DNA     | recessive |

|                                      |                             |           |           |
|--------------------------------------|-----------------------------|-----------|-----------|
| <i>ahk2-5ahk3-7</i>                  | <i>Arabidopsis thaliana</i> | T-DNA     | recessive |
| <i>ahk2ahk3cre1</i>                  | <i>Arabidopsis thaliana</i> | T-DNA     | recessive |
| <i>ahk2cre1</i>                      | <i>Arabidopsis thaliana</i> | T-DNA     | recessive |
| <i>ahk3-3</i>                        | <i>Arabidopsis thaliana</i> | T-DNA     | recessive |
| <i>ahk3-7</i>                        | <i>Arabidopsis thaliana</i> | T-DNA     | recessive |
| <i>ahk3cre1</i>                      | <i>Arabidopsis thaliana</i> | T-DNA     | recessive |
| <i>alh1</i>                          | <i>Arabidopsis thaliana</i> | EMS       | recessive |
| <i>amiRgox1/2</i>                    | <i>Arabidopsis thaliana</i> | Transgene | recessive |
| <i>amiRNA-CaM1</i>                   | <i>Arabidopsis thaliana</i> | RNAi      | recessive |
| <i>anac002/ataf1-1 (SALK_067648)</i> | <i>Arabidopsis thaliana</i> | T-DNA     | recessive |
| <i>anac017</i>                       | <i>Arabidopsis thaliana</i> | T-DNA     | recessive |
| <i>anac017anac082</i>                | <i>Arabidopsis thaliana</i> | cross     | recessive |
| <i>anac017anac090</i>                | <i>Arabidopsis thaliana</i> | cross     | recessive |
| <i>ANAC017ox</i>                     | <i>Arabidopsis thaliana</i> | Transgene | dominant  |
| <i>anac019 (SALK_096295)</i>         | <i>Arabidopsis thaliana</i> | T-DNA     | recessive |
| <i>anac046</i>                       | <i>Arabidopsis thaliana</i> | T-DNA     | recessive |
| <i>ANAC046ox</i>                     | <i>Arabidopsis thaliana</i> | Transgene | dominant  |
| <i>ANAC046SRDX</i>                   | <i>Arabidopsis thaliana</i> | Transgene | recessive |
| <i>anac055 (SALK_014331)</i>         | <i>Arabidopsis thaliana</i> | T-DNA     | recessive |
| <i>anac072/rd26 (SALK_063576)</i>    | <i>Arabidopsis thaliana</i> | T-DNA     | recessive |
| <i>anac081/ataf2 (SALK_015750)</i>   | <i>Arabidopsis thaliana</i> | T-DNA     | recessive |
| <i>anac082</i>                       | <i>Arabidopsis thaliana</i> | T-DNA     | recessive |
| <i>anac082anac090</i>                | <i>Arabidopsis thaliana</i> | cross     | recessive |
| <i>ANAC082ox</i>                     | <i>Arabidopsis thaliana</i> | Transgene | dominant  |
| <i>anac090</i>                       | <i>Arabidopsis thaliana</i> | cross     | recessive |
| <i>ANAC090ox</i>                     | <i>Arabidopsis thaliana</i> | Transgene | dominant  |
| <i>anac092-1</i>                     | <i>Arabidopsis thaliana</i> | T-DNA     | recessive |
| <i>ANAC092-IOE</i>                   | <i>Arabidopsis thaliana</i> | Transgene | dominant  |
| <i>ANAC092-RNAi</i>                  | <i>Arabidopsis thaliana</i> | RNAi      | recessive |
| <i>anac102 (SALK_030702)</i>         | <i>Arabidopsis thaliana</i> | T-DNA     | recessive |
| <i>ap2</i>                           | <i>Arabidopsis thaliana</i> | T-DNA     | recessive |
| <i>apt1</i>                          | <i>Arabidopsis thaliana</i> | T-DNA     | recessive |
| <i>arf1-5 arf2-8</i>                 | <i>Arabidopsis thaliana</i> | T-DNA     | recessive |
| <i>arf2-5</i>                        | <i>Arabidopsis thaliana</i> | T-DNA     | recessive |
| <i>arf2-8</i>                        | <i>Arabidopsis thaliana</i> | T-DNA     | recessive |
| <i>arf2-8 nph4-1 arf19-4</i>         | <i>Arabidopsis thaliana</i> | cross     | recessive |
| <i>ARR2K90G-HA ox</i>                | <i>Arabidopsis thaliana</i> | Transgene | dominant  |
| <i>arr3 arr4 arr5 arr6 arr8 arr9</i> | <i>Arabidopsis thaliana</i> | T-DNA     | recessive |
| <i>arr3arr4arr5arr6</i>              | <i>Arabidopsis thaliana</i> | T-DNA     | recessive |
| <i>asat1-1</i>                       | <i>Arabidopsis thaliana</i> | T-DNA     | recessive |
| <i>asat1-1psat1-1</i>                | <i>Arabidopsis thaliana</i> | T-DNA     | recessive |
| <i>asat1-1psat1-2</i>                | <i>Arabidopsis thaliana</i> | T-DNA     | recessive |
| <i>asn2-1</i>                        | <i>Arabidopsis thaliana</i> | T-DNA     | recessive |
| <i>asn2-2</i>                        | <i>Arabidopsis thaliana</i> | T-DNA     | recessive |

|                                 |                             |           |           |
|---------------------------------|-----------------------------|-----------|-----------|
| <i>at2-mmp-1</i>                | <i>Arabidopsis thaliana</i> | T-DNA     | recessive |
| <i>Ataah</i>                    | <i>Arabidopsis thaliana</i> | T-DNA     | recessive |
| <i>ataf1-4</i>                  | <i>Arabidopsis thaliana</i> | T-DNA     | recessive |
| <i>Ataln</i>                    | <i>Arabidopsis thaliana</i> | T-DNA     | recessive |
| <i>atapg9-1</i>                 | <i>Arabidopsis thaliana</i> | T-DNA     | recessive |
| <i>AtATG18a RNAi plant</i>      | <i>Arabidopsis thaliana</i> | RNAi      | recessive |
| <i>atatg5</i>                   | <i>Arabidopsis thaliana</i> | T-DNA     | recessive |
| <i>AtBAG5 (SALKseq_037369)</i>  | <i>Arabidopsis thaliana</i> | T-DNA     | recessive |
| <i>AtBAG5 (SALKseq_205784C)</i> | <i>Arabidopsis thaliana</i> | T-DNA     | recessive |
| <i>atbi1-1</i>                  | <i>Arabidopsis thaliana</i> | T-DNA     | recessive |
| <i>atbi1-2</i>                  | <i>Arabidopsis thaliana</i> | T-DNA     | recessive |
| <i>AtCHX24OX</i>                | <i>Arabidopsis thaliana</i> | Transgene | dominant  |
| <i>AtCYO1ox</i>                 | <i>Arabidopsis thaliana</i> | Transgene | dominant  |
| <i>AtFAAHOE</i>                 | <i>Arabidopsis thaliana</i> | Transgene | dominant  |
| <i>atfer1-2</i>                 | <i>Arabidopsis thaliana</i> | T-DNA     | recessive |
| <i>atfish6</i>                  | <i>Arabidopsis thaliana</i> | T-DNA     | recessive |
| <i>atg10-1</i>                  | <i>Arabidopsis thaliana</i> | T-DNA     | recessive |
| <i>atg11-1</i>                  | <i>Arabidopsis thaliana</i> | T-DNA     | recessive |
| <i>atg2</i>                     | <i>Arabidopsis thaliana</i> | T-DNA     | recessive |
| <i>atg2pen2</i>                 | <i>Arabidopsis thaliana</i> | cross     | recessive |
| <i>atg4a4b-1</i>                | <i>Arabidopsis thaliana</i> | T-DNA     | recessive |
| <i>atg5coi1</i>                 | <i>Arabidopsis thaliana</i> | cross     | recessive |
| <i>atg5ein2</i>                 | <i>Arabidopsis thaliana</i> | T-DNA     | recessive |
| <i>atg5jar1</i>                 | <i>Arabidopsis thaliana</i> | cross     | recessive |
| <i>atg5npr1</i>                 | <i>Arabidopsis thaliana</i> | cross     | recessive |
| <i>atg5pen1</i>                 | <i>Arabidopsis thaliana</i> | cross     | recessive |
| <i>atg5pen2</i>                 | <i>Arabidopsis thaliana</i> | cross     | recessive |
| <i>atg5sid2</i>                 | <i>Arabidopsis thaliana</i> | cross     | recessive |
| <i>atgrp7-1</i>                 | <i>Arabidopsis thaliana</i> | T-DNA     | recessive |
| <i>AtIAA17ox</i>                | <i>Arabidopsis thaliana</i> | Transgene | dominant  |
| <i>ATL31KO</i>                  | <i>Arabidopsis thaliana</i> | Transgene | dominant  |
| <i>ATL31ox</i>                  | <i>Arabidopsis thaliana</i> | Transgene | dominant  |
| <i>AtMKP2i</i>                  | <i>Arabidopsis thaliana</i> | RNAi      | recessive |
| <i>atmybl RNAi</i>              | <i>Arabidopsis thaliana</i> | RNAi      | recessive |
| <i>AtMYBLox</i>                 | <i>Arabidopsis thaliana</i> | Transgene | dominant  |
| <i>AtMYBR1ox</i>                | <i>Arabidopsis thaliana</i> | Transgene | dominant  |
| <i>atmyr1</i>                   | <i>Arabidopsis thaliana</i> | T-DNA     | recessive |
| <i>atmap</i>                    | <i>Arabidopsis thaliana</i> | T-DNA     | recessive |
| <i>atmos1</i>                   | <i>Arabidopsis thaliana</i> | T-DNA     | recessive |
| <i>AtOM66OX</i>                 | <i>Arabidopsis thaliana</i> | Transgene | dominant  |
| <i>atpap26(Salk_152821)</i>     | <i>Arabidopsis thaliana</i> | T-DNA     | recessive |
| <i>AtTORi</i>                   | <i>Arabidopsis thaliana</i> | RNAi      | recessive |
| <i>AtTOR_RNAi</i>               | <i>Arabidopsis thaliana</i> | RNAi      | recessive |
| <i>Atxdh1</i>                   | <i>Arabidopsis thaliana</i> | T-DNA     | recessive |

|                                    |                             |                |           |
|------------------------------------|-----------------------------|----------------|-----------|
| <i>aux1-7/GVG:GmSARK</i>           | <i>Arabidopsis thaliana</i> | cross          | recessive |
| <i>azf2</i>                        | <i>Arabidopsis thaliana</i> | T-DNA          | recessive |
| <i>bag5-1 (SALK_037369)</i>        | <i>Arabidopsis thaliana</i> | T-DNA          | recessive |
| <i>bag5-1 (SALK_205784C)</i>       | <i>Arabidopsis thaliana</i> | T-DNA          | recessive |
| <i>bap1</i>                        | <i>Arabidopsis thaliana</i> | T-DNA          | recessive |
| <i>bap1bap2</i>                    | <i>Arabidopsis thaliana</i> | T-DNA          | recessive |
| <i>bap2</i>                        | <i>Arabidopsis thaliana</i> | T-DNA          | recessive |
| <i>bb/eod1-2</i>                   | <i>Arabidopsis thaliana</i> | T-DNA          | recessive |
| <i>bcd1-1D</i>                     | <i>Arabidopsis thaliana</i> | Activation tag | dominant  |
| <i>BCG</i>                         | <i>Arabidopsis thaliana</i> | Transgene      | dominant  |
| <i>bcl1</i>                        | <i>Arabidopsis thaliana</i> | T-DNA          | recessive |
| <i>bhlh03 bhlh13 bhlh14 bhlh17</i> | <i>Arabidopsis thaliana</i> | cross          | recessive |
| <i>bot1</i>                        | <i>Arabidopsis thaliana</i> | EMS            | recessive |
| <i>bri</i>                         | <i>Arabidopsis thaliana</i> | EMS            | recessive |
| <i>ccx1-1 (SALK_035514)</i>        | <i>Arabidopsis thaliana</i> | T-DNA          | recessive |
| <i>ccx4 (SALK_040272)</i>          | <i>Arabidopsis thaliana</i> | T-DNA          | recessive |
| <i>chmp7-1, SALK_094259C</i>       | <i>Arabidopsis thaliana</i> | T-DNA          | recessive |
| <i>CHMP7ox</i>                     | <i>Arabidopsis thaliana</i> | Transgene      | dominant  |
| <i>cipk14</i>                      | <i>Arabidopsis thaliana</i> | T-DNA          | recessive |
| <i>clh1-1 (SALK_124978)</i>        | <i>Arabidopsis thaliana</i> | T-DNA          | recessive |
| <i>clh2-2 (SAIL_646_E09)</i>       | <i>Arabidopsis thaliana</i> | T-DNA          | recessive |
| <i>cos1</i>                        | <i>Arabidopsis thaliana</i> | EMS            | recessive |
| <i>cre1/ahk4</i>                   | <i>Arabidopsis thaliana</i> | T-DNA          | recessive |
| <i>crf1,3,5,6</i>                  | <i>Arabidopsis thaliana</i> | T-DNA          | recessive |
| <i>CRF1ox</i>                      | <i>Arabidopsis thaliana</i> | Transgene      | dominant  |
| <i>crf2-3</i>                      | <i>Arabidopsis thaliana</i> | T-DNA          | recessive |
| <i>crf1,3,5,6</i>                  | <i>Arabidopsis thaliana</i> | T-DNA          | recessive |
| <i>CRF3ox</i>                      | <i>Arabidopsis thaliana</i> | Transgene      | dominant  |
| <i>crf5-5</i>                      | <i>Arabidopsis thaliana</i> | T-DNA          | recessive |
| <i>CRF5ox</i>                      | <i>Arabidopsis thaliana</i> | Transgene      | dominant  |
| <i>crf6</i>                        | <i>Arabidopsis thaliana</i> | T-DNA          | recessive |
| <i>crf6-3</i>                      | <i>Arabidopsis thaliana</i> | T-DNA          | recessive |
| <i>CRF6ox</i>                      | <i>Arabidopsis thaliana</i> | Transgene      | dominant  |
| <i>crs</i>                         | <i>Arabidopsis thaliana</i> | T-DNA          | recessive |
| <i>ctr1-1</i>                      | <i>Arabidopsis thaliana</i> | EMS            | recessive |
| <i>cvp1-3</i>                      | <i>Arabidopsis thaliana</i> | EMS            | recessive |
| <i>cyp51A2</i>                     | <i>Arabidopsis thaliana</i> | T-DNA          | recessive |
| <i>d2hgdh1-1</i>                   | <i>Arabidopsis thaliana</i> | T-DNA          | recessive |
| <i>d2hgdh1-3</i>                   | <i>Arabidopsis thaliana</i> | T-DNA          | recessive |
| <i>da1</i>                         | <i>Arabidopsis thaliana</i> | T-DNA          | recessive |
| <i>da1-1_bb/eod1-2</i>             | <i>Arabidopsis thaliana</i> | cross          | recessive |
| <i>ddm1-2</i>                      | <i>Arabidopsis thaliana</i> | T-DNA          | recessive |
| <i>det2</i>                        | <i>Arabidopsis thaliana</i> | EMS            | recessive |
| <i>DEX-UBA2a-OX</i>                | <i>Arabidopsis thaliana</i> | Transgene      | dominant  |

|                                          |                             |           |           |
|------------------------------------------|-----------------------------|-----------|-----------|
| <i>DEX-UBA2b-OX</i>                      | <i>Arabidopsis thaliana</i> | Transgene | dominant  |
| <i>DEX-UBA2c-OX</i>                      | <i>Arabidopsis thaliana</i> | Transgene | dominant  |
| <i>DEXin:MKK9</i>                        | <i>Arabidopsis thaliana</i> | Transgene | dominant  |
| <i>dls1</i>                              | <i>Arabidopsis thaliana</i> | T-DNA     | recessive |
| <i>dmr1</i>                              | <i>Arabidopsis thaliana</i> | T-DNA     | recessive |
| <i>dnd1</i>                              | <i>Arabidopsis thaliana</i> | EMS       | recessive |
| <i>drd1-6</i>                            | <i>Arabidopsis thaliana</i> | T-DNA     | recessive |
| <i>dreb2a</i>                            | <i>Arabidopsis thaliana</i> | T-DNA     | recessive |
| <i>drl1-D</i>                            | <i>Arabidopsis thaliana</i> | Transgene | dominant  |
| <i>dur3-1</i>                            | <i>Arabidopsis thaliana</i> | T-DNA     | recessive |
| <i>e1a1-1 (SALK_071680C)</i>             | <i>Arabidopsis thaliana</i> | T-DNA     | recessive |
| <i>e1a2-1 (CS68926)</i>                  | <i>Arabidopsis thaliana</i> | T-DNA     | recessive |
| <i>edr1</i>                              | <i>Arabidopsis thaliana</i> | EMS       | recessive |
| <i>ein2-1/GVG:GmSARK</i>                 | <i>Arabidopsis thaliana</i> | cross     | recessive |
| <i>ein2-34</i>                           | <i>Arabidopsis thaliana</i> | EMS       | recessive |
| <i>ein2-5EIL1ox</i>                      | <i>Arabidopsis thaliana</i> | cross     | NA        |
| <i>ein3</i>                              | <i>Arabidopsis thaliana</i> | EMS       | recessive |
| <i>elf3-1</i>                            | <i>Arabidopsis thaliana</i> | T-DNA     | recessive |
| <i>ELF3ox</i>                            | <i>Arabidopsis thaliana</i> | Transgene | dominant  |
| <i>elf4-209;elf3-1 elf4-209</i>          | <i>Arabidopsis thaliana</i> | cross     | recessive |
| <i>els1-1 (SAIL_1236_H10)</i>            | <i>Arabidopsis thaliana</i> | T-DNA     | recessive |
| <i>els1-D</i>                            | <i>Arabidopsis thaliana</i> | Transgene | dominant  |
| <i>erd1</i>                              | <i>Arabidopsis thaliana</i> | T-DNA     | recessive |
| <i>ESROE</i>                             | <i>Arabidopsis thaliana</i> | Transgene | dominant  |
| <i>ESROEWRKY53KO</i>                     | <i>Arabidopsis thaliana</i> | T-DNA     | recessive |
| <i>ESROEWRKY53OE</i>                     | <i>Arabidopsis thaliana</i> | Transgene | dominant  |
| <i>etfqo-1</i>                           | <i>Arabidopsis thaliana</i> | T-DNA     | recessive |
| <i>etfqo-2</i>                           | <i>Arabidopsis thaliana</i> | T-DNA     | recessive |
| <i>etr1-1</i>                            | <i>Arabidopsis thaliana</i> | EMS       | dominant  |
| <i>etr1-9;ers1-3</i>                     | <i>Arabidopsis thaliana</i> | T-DNA     | recessive |
| <i>FaNYE1OE</i>                          | <i>Arabidopsis thaliana</i> | Transgene | dominant  |
| <i>far1-2</i>                            | <i>Arabidopsis thaliana</i> | T-DNA     | recessive |
| <i>flty3-4</i>                           | <i>Arabidopsis thaliana</i> | T-DNA     | recessive |
| <i>flo2(SALK_138275)</i>                 | <i>Arabidopsis thaliana</i> | T-DNA     | recessive |
| <i>ftsh4-4</i>                           | <i>Arabidopsis thaliana</i> | T-DNA     | recessive |
| <i>ful-2</i>                             | <i>Arabidopsis thaliana</i> | T-DNA     | recessive |
| <i>fz1-1: SALK_118335</i>                | <i>Arabidopsis thaliana</i> | T-DNA     | recessive |
| <i>fz1-2: SALK_033745C</i>               | <i>Arabidopsis thaliana</i> | T-DNA     | recessive |
| <i>fz1-3: SALK_152584C</i>               | <i>Arabidopsis thaliana</i> | T-DNA     | recessive |
| <i>ga1-3 gai-t6 rga-t2 rgl1-1 rgl2-1</i> | <i>Arabidopsis thaliana</i> | cross     | recessive |
| <i>gbf1</i>                              | <i>Arabidopsis thaliana</i> | T-DNA     | recessive |
| <i>gme-1 (CS827235)</i>                  | <i>Arabidopsis thaliana</i> | T-DNA     | recessive |
| <i>GR2 RNAi</i>                          | <i>Arabidopsis thaliana</i> | RNAi      | recessive |
| <i>gr2(SALK_040170)</i>                  | <i>Arabidopsis thaliana</i> | T-DNA     | recessive |

|                              |                             |                      |           |
|------------------------------|-----------------------------|----------------------|-----------|
| <i>GVG:AtSARK</i>            | <i>Arabidopsis thaliana</i> | Transgene            | dominant  |
| <i>HAD6_RNAi</i>             | <i>Arabidopsis thaliana</i> | RNAi                 | recessive |
| <i>hcar</i>                  | <i>Arabidopsis thaliana</i> | T-DNA                | recessive |
| <i>HCAR-OX</i>               | <i>Arabidopsis thaliana</i> | Transgene            | dominant  |
| <i>hda13</i>                 | <i>Arabidopsis thaliana</i> | T-DNA                | recessive |
| <i>hda9</i>                  | <i>Arabidopsis thaliana</i> | T-DNA                | recessive |
| <i>hda9pwr</i>               | <i>Arabidopsis thaliana</i> | cross                | recessive |
| <i>hpr1-4 edr1</i>           | <i>Arabidopsis thaliana</i> | EMS                  | recessive |
| <i>iaa17-1 (SALK_065697)</i> | <i>Arabidopsis thaliana</i> | T-DNA                | recessive |
| <i>iaa17-2 (SALK_011820)</i> | <i>Arabidopsis thaliana</i> | T-DNA                | recessive |
| <i>iAtNAP</i>                | <i>Arabidopsis thaliana</i> | Transgene            | dominant  |
| <i>iRPK1</i>                 | <i>Arabidopsis thaliana</i> | Transgene            | dominant  |
| <i>iRPK1-GFP</i>             | <i>Arabidopsis thaliana</i> | Transgene            | dominant  |
| <i>iRPK1-GFP/rbohF</i>       | <i>Arabidopsis thaliana</i> | T-DNA                | recessive |
| <i>ispF-1</i>                | <i>Arabidopsis thaliana</i> | T-DNA                | recessive |
| <i>ivdh-1</i>                | <i>Arabidopsis thaliana</i> | T-DNA                | recessive |
| <i>jaw-D/mir319</i>          | <i>Arabidopsis thaliana</i> | Activation tag       | dominant  |
| <i>jaz7</i>                  | <i>Arabidopsis thaliana</i> | T-DNA                | recessive |
| <i>jmj16-1</i>               | <i>Arabidopsis thaliana</i> | T-DNA                | recessive |
| <i>jub1-1</i>                | <i>Arabidopsis thaliana</i> | T-DNA                | recessive |
| <i>KAT2as</i>                | <i>Arabidopsis thaliana</i> | RNAi                 | recessive |
| <i>KAT2ox</i>                | <i>Arabidopsis thaliana</i> | Transgene            | dominant  |
| <i>khz1(SALK_057095C)</i>    | <i>Arabidopsis thaliana</i> | T-DNA                | recessive |
| <i>KHZ1-OE</i>               | <i>Arabidopsis thaliana</i> | Transgene            | dominant  |
| <i>khz1khz2</i>              | <i>Arabidopsis thaliana</i> | T-DNA                | recessive |
| <i>khz2</i>                  | <i>Arabidopsis thaliana</i> | T-DNA                | recessive |
| <i>KHZ2-OE</i>               | <i>Arabidopsis thaliana</i> | Transgene            | dominant  |
| <i>KIN10-OE</i>              | <i>Arabidopsis thaliana</i> | Transgene            | dominant  |
| <i>LARP1c-DEX</i>            | <i>Arabidopsis thaliana</i> | Transgene            | dominant  |
| <i>LARP1c-OE</i>             | <i>Arabidopsis thaliana</i> | Transgene            | dominant  |
| <i>LARP1cOE</i>              | <i>Arabidopsis thaliana</i> | Transgene            | dominant  |
| <i>lew1</i>                  | <i>Arabidopsis thaliana</i> | EMS                  | recessive |
| <i>LOX2-RNAi</i>             | <i>Arabidopsis thaliana</i> | RNAi                 | dominant  |
| <i>lux-6</i>                 | <i>Arabidopsis thaliana</i> | T-DNA                | recessive |
| <i>mes16-1</i>               | <i>Arabidopsis thaliana</i> | T-DNA                | recessive |
| <i>mes16-2</i>               | <i>Arabidopsis thaliana</i> | T-DNA                | recessive |
| <i>mir164a-4</i>             | <i>Arabidopsis thaliana</i> | T-DNA                | recessive |
| <i>mir164abc</i>             | <i>Arabidopsis thaliana</i> | cross                | recessive |
| <i>mir164b-1</i>             | <i>Arabidopsis thaliana</i> | T-DNA                | recessive |
| <i>mir164c-2</i>             | <i>Arabidopsis thaliana</i> | transposon insertion | recessive |
| <i>mkk9-1</i>                | <i>Arabidopsis thaliana</i> | T-DNA                | recessive |
| <i>mpk6-2</i>                | <i>Arabidopsis thaliana</i> | T-DNA                | recessive |
| <i>mpk6-3</i>                | <i>Arabidopsis thaliana</i> | T-DNA                | recessive |
| <i>mybh-1</i>                | <i>Arabidopsis thaliana</i> | T-DNA                | recessive |



|                              |                             |                          |           |
|------------------------------|-----------------------------|--------------------------|-----------|
| <i>MYBHox</i>                | <i>Arabidopsis thaliana</i> | Transgene                | dominant  |
| <i>myc2 myc3 myc4</i>        | <i>Arabidopsis thaliana</i> | cross                    | recessive |
| <i>MYC2OE</i>                | <i>Arabidopsis thaliana</i> | Transgene                | dominant  |
| <i>MYC3OE</i>                | <i>Arabidopsis thaliana</i> | Transgene                | dominant  |
| <i>MYC4OE</i>                | <i>Arabidopsis thaliana</i> | Transgene                | dominant  |
| <i>myc5(SALK_060048C)</i>    | <i>Arabidopsis thaliana</i> | cross                    | recessive |
| <i>MYC5OE</i>                | <i>Arabidopsis thaliana</i> | Transgene                | dominant  |
| <i>nac016-1</i>              | <i>Arabidopsis thaliana</i> | T-DNA                    | recessive |
| <i>NAC016-OX</i>             | <i>Arabidopsis thaliana</i> | Transgene                | dominant  |
| <i>nac1</i>                  | <i>Arabidopsis thaliana</i> | T-DNA                    | recessive |
| <i>nac16</i>                 | <i>Arabidopsis thaliana</i> | T-DNA                    | recessive |
| <i>nac55</i>                 | <i>Arabidopsis thaliana</i> | T-DNA                    | recessive |
| <i>NahG Transgene plant</i>  | <i>Arabidopsis thaliana</i> | Transgene                | dominant  |
| <i>nes1</i>                  | <i>Arabidopsis thaliana</i> | T-DNA                    | recessive |
| <i>npr1-1</i>                | <i>Arabidopsis thaliana</i> | EMS                      | recessive |
| <i>nrt1.5</i>                | <i>Arabidopsis thaliana</i> | T-DNA                    | recessive |
| <i>NSR1/MYR2ox</i>           | <i>Arabidopsis thaliana</i> | Transgene                | dominant  |
| <i>ntl4-1</i>                | <i>Arabidopsis thaliana</i> | T-DNA                    | recessive |
| <i>ntl4-2</i>                | <i>Arabidopsis thaliana</i> | T-DNA                    | recessive |
| <i>ntl9-1</i>                | <i>Arabidopsis thaliana</i> | T-DNA                    | recessive |
| <i>nye1-1</i>                | <i>Arabidopsis thaliana</i> | fast neutron mutagenesis | recessive |
| <i>oeCIPK14</i>              | <i>Arabidopsis thaliana</i> | Transgene                | dominant  |
| <i>om47-1 (SALK_016767)</i>  | <i>Arabidopsis thaliana</i> | T-DNA                    | recessive |
| <i>om47-2 (GABI_369G03)</i>  | <i>Arabidopsis thaliana</i> | T-DNA                    | recessive |
| <i>ore1-1</i>                | <i>Arabidopsis thaliana</i> | EMS                      | recessive |
| <i>ore12-1</i>               | <i>Arabidopsis thaliana</i> | EMS                      | dominant  |
| <i>ore15-1D</i>              | <i>Arabidopsis thaliana</i> | EMS                      | recessive |
| <i>ore3</i>                  | <i>Arabidopsis thaliana</i> | EMS                      | recessive |
| <i>ore4-1</i>                | <i>Arabidopsis thaliana</i> | T-DNA                    | recessive |
| <i>ORE7-OX</i>               | <i>Arabidopsis thaliana</i> | Transgene                | dominant  |
| <i>ORE7/ore7-1D</i>          | <i>Arabidopsis thaliana</i> | T-DNA                    | dominant  |
| <i>ORE7/ore7-2D</i>          | <i>Arabidopsis thaliana</i> | T-DNA                    | dominant  |
| <i>ore9-1</i>                | <i>Arabidopsis thaliana</i> | EMS                      | recessive |
| <i>ORS1 RNAi line</i>        | <i>Arabidopsis thaliana</i> | RNAi                     | recessive |
| <i>ors1-1</i>                | <i>Arabidopsis thaliana</i> | T-DNA                    | recessive |
| <i>ors1-1/anac092-1</i>      | <i>Arabidopsis thaliana</i> | T-DNA                    | recessive |
| <i>OxBAG5</i>                | <i>Arabidopsis thaliana</i> | Transgene                | dominant  |
| <i>pad4</i>                  | <i>Arabidopsis thaliana</i> | T-DNA                    | dominant  |
| <i>pas2-1</i>                | <i>Arabidopsis thaliana</i> | T-DNA                    | recessive |
| <i>pat13-1 (SALK_015570)</i> | <i>Arabidopsis thaliana</i> | T-DNA                    | recessive |
| <i>pat14-1 (SALK_026159)</i> | <i>Arabidopsis thaliana</i> | T-DNA                    | recessive |
| <i>Pht1;5 overexpressor</i>  | <i>Arabidopsis thaliana</i> | Transgene                | dominant  |
| <i>phyA</i>                  | <i>Arabidopsis thaliana</i> | T-DNA                    | recessive |
| <i>PHYBox</i>                | <i>Arabidopsis thaliana</i> | Transgene                | dominant  |

|                                                            |                             |              |           |
|------------------------------------------------------------|-----------------------------|--------------|-----------|
| <i>pi3k-1: SALK_007281</i>                                 | <i>Arabidopsis thaliana</i> | T-DNA        | recessive |
| <i>pif1-2pif3-3 pif4-2 pif5-3 (pifq)</i>                   | <i>Arabidopsis thaliana</i> | cross        | recessive |
| <i>PIF3ox, pif1-2pif3-3 pif4-2 pif5-3 (pifq)</i>           | <i>Arabidopsis thaliana</i> | cross        | recessive |
| <i>PIF4ox, pif4pif5, pif1-2pif3-3 pif4-2 pif5-3 (pifq)</i> | <i>Arabidopsis thaliana</i> | cross        | recessive |
| <i>PIF5ox, pif4pif5, pif1-2pif3-3 pif4-2 pif5-3 (pifq)</i> | <i>Arabidopsis thaliana</i> | cross        | recessive |
| <i>PPDK overexpression line</i>                            | <i>Arabidopsis thaliana</i> | Transgene    | dominant  |
| <i>pph-1</i>                                               | <i>Arabidopsis thaliana</i> | T-DNA        | recessive |
| <i>prD29A::PYL9</i>                                        | <i>Arabidopsis thaliana</i> | Transgene    | dominant  |
| <i>Pro35S:YFP-CRS</i>                                      | <i>Arabidopsis thaliana</i> | Transgene    | dominant  |
| <i>prr9</i>                                                | <i>Arabidopsis thaliana</i> | T-DNA        | recessive |
| <i>prx33</i>                                               | <i>Arabidopsis thaliana</i> | T-DNA        | recessive |
| <i>PRX34</i>                                               | <i>Arabidopsis thaliana</i> | T-DNA        | recessive |
| <i>PRX34RNAi</i>                                           | <i>Arabidopsis thaliana</i> | RNAi         | recessive |
| <i>psal-2</i>                                              | <i>Arabidopsis thaliana</i> | T-DNA        | recessive |
| <i>psat1-1</i>                                             | <i>Arabidopsis thaliana</i> | T-DNA        | recessive |
| <i>psat1-2</i>                                             | <i>Arabidopsis thaliana</i> | T-DNA        | recessive |
| <i>pub12</i>                                               | <i>Arabidopsis thaliana</i> | T-DNA        | recessive |
| <i>pub13</i>                                               | <i>Arabidopsis thaliana</i> | T-DNA        | recessive |
| <i>pub4-6</i>                                              | <i>Arabidopsis thaliana</i> | T-DNA        | recessive |
| <i>pwr</i>                                                 | <i>Arabidopsis thaliana</i> | T-DNA        | recessive |
| <i>pyl8-1pyl9</i>                                          | <i>Arabidopsis thaliana</i> | cross        | recessive |
| <i>PYL8ox</i>                                              | <i>Arabidopsis thaliana</i> | Transgene    | dominant  |
| <i>rabF1-1 (SAIL_98_E08)</i>                               | <i>Arabidopsis thaliana</i> | T-DNA        | recessive |
| <i>RabF1OE</i>                                             | <i>Arabidopsis thaliana</i> | Transgene    | dominant  |
| <i>RabG3box</i>                                            | <i>Arabidopsis thaliana</i> | Transgene    | dominant  |
| <i>Rap2.4fOE</i>                                           | <i>Arabidopsis thaliana</i> | Transgene    | dominant  |
| <i>rap2.6L</i>                                             | <i>Arabidopsis thaliana</i> | T-DNA        | recessive |
| <i>RAP2.6LOE</i>                                           | <i>Arabidopsis thaliana</i> | Transgene    | dominant  |
| <i>rav1</i>                                                | <i>Arabidopsis thaliana</i> | T-DNA        | recessive |
| <i>RAV1OX</i>                                              | <i>Arabidopsis thaliana</i> | Transgene    | dominant  |
| <i>rcd1-4</i>                                              | <i>Arabidopsis thaliana</i> | T-DNA        | recessive |
| <i>rev5</i>                                                | <i>Arabidopsis thaliana</i> | T-DNA        | recessive |
| <i>rpkl-3</i>                                              | <i>Arabidopsis thaliana</i> | Ds insertion | recessive |
| <i>rpkl-4</i>                                              | <i>Arabidopsis thaliana</i> | Ds insertion | recessive |
| <i>rps6a (SALK_012147)</i>                                 | <i>Arabidopsis thaliana</i> | T-DNA        | recessive |
| <i>rps6b (SALK_061539)</i>                                 | <i>Arabidopsis thaliana</i> | T-DNA        | recessive |
| <i>RRTF1oe</i>                                             | <i>Arabidopsis thaliana</i> | Transgene    | dominant  |
| <i>s3h</i>                                                 | <i>Arabidopsis thaliana</i> | T-DNA        | recessive |
| <i>s40-3a</i>                                              | <i>Arabidopsis thaliana</i> | T-DNA        | recessive |
| <i>SAG113in</i>                                            | <i>Arabidopsis thaliana</i> | Transgene    | dominant  |
| <i>SAG113KO</i>                                            | <i>Arabidopsis thaliana</i> | T-DNA        | recessive |

|                                     |                             |                |           |
|-------------------------------------|-----------------------------|----------------|-----------|
| <i>sag12-2</i>                      | <i>Arabidopsis thaliana</i> | T-DNA          | recessive |
| <i>sag29-1</i>                      | <i>Arabidopsis thaliana</i> | T-DNA          | recessive |
| <i>sag29-2</i>                      | <i>Arabidopsis thaliana</i> | T-DNA          | recessive |
| <i>SALK_145341</i>                  | <i>Arabidopsis thaliana</i> | T-DNA          | recessive |
| <i>sark-1</i>                       | <i>Arabidopsis thaliana</i> | T-DNA          | recessive |
| <i>sasp-1, SALK_147962</i>          | <i>Arabidopsis thaliana</i> | T-DNA          | recessive |
| <i>sasp-2, SALK_063823</i>          | <i>Arabidopsis thaliana</i> | T-DNA          | recessive |
| <i>sau11-1</i>                      | <i>Arabidopsis thaliana</i> | T-DNA          | recessive |
| <i>sau11-2</i>                      | <i>Arabidopsis thaliana</i> | T-DNA          | recessive |
| <i>saur36</i>                       | <i>Arabidopsis thaliana</i> | T-DNA          | recessive |
| <i>SAUR36 overexpressing plants</i> | <i>Arabidopsis thaliana</i> | Transgene      | dominant  |
| <i>saur36-1</i>                     | <i>Arabidopsis thaliana</i> | T-DNA          | recessive |
| <i>saur36-2</i>                     | <i>Arabidopsis thaliana</i> | T-DNA          | recessive |
| <i>sgr2-1</i>                       | <i>Arabidopsis thaliana</i> | T-DNA          | recessive |
| <i>SGRLOX</i>                       | <i>Arabidopsis thaliana</i> | Transgene      | dominant  |
| <i>sid2</i>                         | <i>Arabidopsis thaliana</i> | T-DNA          | recessive |
| <i>SINAL7ox</i>                     | <i>Arabidopsis thaliana</i> | Transgene      | dominant  |
| <i>SINAPI2-KD</i>                   | <i>Arabidopsis thaliana</i> | cross          | recessive |
| <i>snrk2.2/2.3/2.6</i>              | <i>Arabidopsis thaliana</i> | cross          | recessive |
| <i>snrk2.2/3/6</i>                  | <i>Arabidopsis thaliana</i> | cross          | recessive |
| <i>soc1-3 ful-2</i>                 | <i>Arabidopsis thaliana</i> | cross          | recessive |
| <i>soc1-6 (SALK_138131C)</i>        | <i>Arabidopsis thaliana</i> | T-DNA          | recessive |
| <i>soc1-6 pph-1</i>                 | <i>Arabidopsis thaliana</i> | cross          | recessive |
| <i>sor1-D</i>                       | <i>Arabidopsis thaliana</i> | Activation tag | dominant  |
| <i>sor1-D ore9-1</i>                | <i>Arabidopsis thaliana</i> | cross          | dominant  |
| <i>stn7-1stm8-1</i>                 | <i>Arabidopsis thaliana</i> | cross          | recessive |
| <i>tcp2tcp4</i>                     | <i>Arabidopsis thaliana</i> | T-DNA          | recessive |
| <i>tcp2tcp4tcp10</i>                | <i>Arabidopsis thaliana</i> | T-DNA          | recessive |
| <i>tf12</i>                         | <i>Arabidopsis thaliana</i> | T-DNA          | recessive |
| <i>tic55-II (SALK_086048)</i>       | <i>Arabidopsis thaliana</i> | T-DNA          | recessive |
| <i>TOR-OE</i>                       | <i>Arabidopsis thaliana</i> | Transgene      | dominant  |
| <i>TOR-OE1</i>                      | <i>Arabidopsis thaliana</i> | T-DNA          | dominant  |
| <i>UGT73C6oe</i>                    | <i>Arabidopsis thaliana</i> | tansgene       | dominant  |
| <i>upl5-1</i>                       | <i>Arabidopsis thaliana</i> | T-DNA          | recessive |
| <i>upl5-2</i>                       | <i>Arabidopsis thaliana</i> | T-DNA          | recessive |
| <i>vni2-1</i>                       | <i>Arabidopsis thaliana</i> | T-DNA          | recessive |
| <i>vni2/35S:BnNAC5</i>              | <i>Arabidopsis thaliana</i> | tansgene       | dominant  |
| <i>vps35 b-1vps35c-1</i>            | <i>Arabidopsis thaliana</i> | cross          | recessive |
| <i>vps35a-1 vps35b-2 vps35c-1</i>   | <i>Arabidopsis thaliana</i> | cross          | recessive |
| <i>vps35a-1(SALK_014345)</i>        | <i>Arabidopsis thaliana</i> | T-DNA          | recessive |
| <i>vps35c-1(SALK_99735)</i>         | <i>Arabidopsis thaliana</i> | T-DNA          | recessive |
| <i>vtc1</i>                         | <i>Arabidopsis thaliana</i> | EMS            | recessive |
| <i>vtc2</i>                         | <i>Arabidopsis thaliana</i> | T-DNA          | recessive |
| <i>why1</i>                         | <i>Arabidopsis thaliana</i> | T-DNA          | recessive |

|                                  |                                                   |                                        |           |
|----------------------------------|---------------------------------------------------|----------------------------------------|-----------|
| <i>why1wrky53</i>                | <i>Arabidopsis thaliana</i>                       | cross                                  | recessive |
| <i>WRKY45RNAi</i>                | <i>Arabidopsis thaliana</i>                       | RNAi                                   | recessive |
| <i>wrky53</i>                    | <i>Arabidopsis thaliana</i>                       | T-DNA                                  | recessive |
| <i>WRKY53OE</i>                  | <i>Arabidopsis thaliana</i>                       | Transgene                              | dominant  |
| <i>wrky54</i>                    | <i>Arabidopsis thaliana</i>                       | T-DNA                                  | recessive |
| <i>wrky54wrky70</i>              | <i>Arabidopsis thaliana</i>                       | T-DNA                                  | recessive |
| <i>wrky57</i>                    | <i>Arabidopsis thaliana</i>                       | T-DNA                                  | recessive |
| <i>wrky6</i>                     | <i>Arabidopsis thaliana</i>                       | T-DNA                                  | recessive |
| <i>wrky70</i>                    | <i>Arabidopsis thaliana</i>                       | T-DNA                                  | recessive |
| <i>wrky75</i>                    | <i>Arabidopsis thaliana</i>                       | T-DNA                                  | recessive |
| <i>WRKY75RNAi</i>                | <i>Arabidopsis thaliana</i>                       | RNAi                                   | recessive |
| <i>yuc6-1D</i>                   | <i>Arabidopsis thaliana</i>                       | T-DNA                                  | dominant  |
| <i>vti12</i>                     | <i>Arabidopsis thaliana</i>                       | T-DNA                                  | recessive |
| <i>iSAG101</i>                   | <i>Arabidopsis thaliana</i>                       | Transgene                              | dominant  |
| <i>SAG101RNAi</i>                | <i>Arabidopsis thaliana</i>                       | antisense                              | recessive |
| <i>GhNAC12ox</i>                 | Cotton ( <i>Gossypium hirsutum</i> )              | Transgene                              | dominant  |
| <i>GhTZF1ox</i>                  | Cotton ( <i>Gossypium hirsutum</i> )              | Transgene                              | dominant  |
| <i>GhWRKY42ox</i>                | Cotton ( <i>Gossypium hirsutum</i> )              | Transgene                              | dominant  |
| <i>35S::sppro::RFP::CYP4KDEL</i> | Easter lily ( <i>Lilium longiflorum</i> )         | Transgene                              | dominant  |
| <i>pSBI-DREB2</i>                | <i>Erianthus arundinaceus</i>                     | Transgene                              | recessive |
| <i>Bj993</i>                     | Fescue ( <i>Festuca pratensis</i> Huds.)          | other                                  | recessive |
| <i>35S::SiNAC1-GFP</i>           | Foxtail millet ( <i>Setaria italica</i> )         | Transgene                              | dominant  |
| <i>siygl2</i>                    | Foxtail millet ( <i>Setaria italica</i> )         | EMS                                    | recessive |
| <i>spl28</i>                     | Hwacheongbyeo (an elite Korean japonica cultivar) | N-methyl-N-nitrosourea (MNU) treatment | recessive |
| <i>PSR26r</i>                    | Japanese morning glory ( <i>Ipomoea nil</i> )     | RNAi                                   | recessive |
| <i>EPH1r</i>                     | Japanese morning glory ( <i>Ipomoea nil</i> ).    | EMS                                    | recessive |
| <i>OsETR2-OX</i>                 | Rice ( <i>Oryza sativa</i> )                      | Transgene                              | dominant  |
| <i>OsETR2-RNAi Lines</i>         | Rice ( <i>Oryza sativa</i> )                      | RNAi                                   | recessive |
| <i>ossgr</i>                     | Rice ( <i>Oryza sativa</i> )                      | N-methyl-N-nitrosourea (MNU) treatment | recessive |
| <i>aba1-1</i>                    | Ler                                               | EMS                                    | recessive |
| <i>bell-1</i>                    | Ler                                               | EMS                                    | recessive |
| <i>gin2-1</i>                    | Ler                                               | EMS                                    | recessive |
| <i>old1-1/cpr5</i>               | Ler                                               | EMS                                    | recessive |
| <i>old2</i>                      | Ler                                               | EMS                                    | recessive |
| <i>old3-1</i>                    | Ler                                               | EMS                                    | recessive |
| <i>old5</i>                      | Ler                                               | EMS                                    | recessive |
| <i>Pro35S:SPL/NZZ plants</i>     | Ler                                               | Transgene                              | dominant  |
| <i>LcMCII-1ox</i>                | <i>Litchi chinensis</i>                           | Transgene                              | dominant  |
| <i>ct2-ref</i>                   | Maize ( <i>Zea mays</i> )                         | EMS                                    | recessive |
| <i>lox3-4</i>                    | Maize ( <i>Zea mays</i> )                         | T-DNA                                  | recessive |
| <i>CCS52A_RNAi</i>               | <i>Medicago sativa</i>                            | RNAi                                   | recessive |
| <i>MINAC5-YFP</i>                | <i>Miscanthus lutarioriparius</i>                 | Transgene                              | dominant  |

|                                         |                                                          |                     |           |
|-----------------------------------------|----------------------------------------------------------|---------------------|-----------|
| <i>MnDREB4A-OE</i>                      | <i>Mulberry Morus notabilis</i>                          | Transgene           | dominant  |
| <i>irNaMPK4</i>                         | <i>Nicotiana attenuata</i>                               | RNAi                | recessive |
| <i>deltandhF/ndhF-deficient tobacco</i> | <i>Nicotiana tabacum</i> other                           |                     | recessive |
| <i>GVG:GmSARK</i>                       | Soybean ( <i>Glycine max</i> )                           | Transgene           | dominant  |
| <i>PpCBF1ox</i>                         | Peach ( <i>Prunus persica</i> )                          | Transgene           | dominant  |
| <i>35S::PcFT2</i>                       | Pear ( <i>Pyrus communis</i> )                           | Transgene           | dominant  |
| <i>TRV2::CaCP</i>                       | Pepper ( <i>Capsicum annuum L.</i> )                     | Transgene           | recessive |
| <i>VIGS-CaPAO</i>                       | Pepper ( <i>Capsicum annuum L.</i> )                     | Transgene           | recessive |
| <i>DkLOX3-OX</i>                        | Persimmon ( <i>Diospyros kaki L.</i><br>'Fupingjianshi') | Transgene           | dominant  |
| <i>GVG::etr1-1 Transgene petunias</i>   | <i>Petunia</i>                                           | Transgene           | dominant  |
| <i>pssgr</i>                            | Pea ( <i>Pisum sativum</i> )                             | other               | recessive |
| <i>GMP-RNAi</i>                         | Potato ( <i>Solanum tuberosum</i> )                      | RNAi                | recessive |
| <i>35S:StUBA2a</i>                      | Potato ( <i>Solanum tuberosum</i> )                      | Transgene           | dominant  |
| <i>35S:StUBA2b</i>                      | Potato ( <i>Solanum tuberosum</i> )                      | Transgene           | dominant  |
| <i>35S:StUBA2c</i>                      | Potato ( <i>Solanum tuberosum</i> )                      | Transgene           | dominant  |
| <i>gamma-TMT-silenced plant</i>         | potato ( <i>Solanum tuberosum</i> )                      | RNAi                | recessive |
| <i>StHPT_RNAi</i>                       | potato ( <i>Solanum tuberosum</i> )                      | RNAi                | recessive |
| <i>35S:BnCHMP7</i>                      | Rapeseed ( <i>Brassica napus</i> )                       | Transgene           | dominant  |
| <i>35S:BnNAC87</i>                      | Rapeseed ( <i>Brassica napus</i> )                       | Transgene           | dominant  |
| <i>BnNCED3-OX</i>                       | Rapeseed ( <i>Brassica napus</i> )                       | Transgene           | dominant  |
| <i>cZOGT1-ox</i>                        | Rice ( <i>Oryza sativa</i> )                             | Transgene           | dominant  |
| <i>cZOGT2-ox</i>                        | Rice ( <i>Oryza sativa</i> )                             | Transgene           | dominant  |
| <i>nyc4-1</i>                           | Rice ( <i>Oryza sativa</i> )                             | EMS                 | recessive |
| <i>nyc3</i>                             | rice ( <i>Oryza sativa</i> )                             | EMS                 | recessive |
| <i>OsGS1;1-knockout mutant</i>          | rice ( <i>Oryza sativa</i> )                             | En-1/Spm-transposon | recessive |
| <i>onac106-1D</i>                       | Rice ( <i>Oryza sativa</i> )                             | Transgene           | dominant  |
| <i>ospil1</i>                           | Rice ( <i>Oryza sativa</i> )                             | Transgene           | dominant  |
| <i>tsd2-1</i>                           | Rice ( <i>Oryza sativa</i> )                             | T-DNA               | recessive |
| <i>35S-RLS1</i>                         | Rice ( <i>Oryza sativa</i> )                             | Transgene           | dominant  |
| <i>35S::OsNAC2</i>                      | Rice ( <i>Oryza sativa</i> )                             | Transgene           | recessive |
| <i>35S:OsHCAR</i>                       | Rice ( <i>Oryza sativa</i> )                             | Transgene           | dominant  |
| <i>35S:OsWRKY42-cMyc</i>                | Rice ( <i>Oryza sativa</i> )                             | Transgene           | dominant  |
| <i>are1-1;are1-2</i>                    | Rice ( <i>Oryza sativa</i> )                             | cross               | recessive |
| <i>bbs1</i>                             | Rice ( <i>Oryza sativa</i> )                             | T-DNA               | recessive |
| <i>del</i>                              | Rice ( <i>Oryza sativa</i> )                             | T-DNA               | recessive |
| <i>dwarf3</i>                           | Rice ( <i>Oryza sativa</i> )                             | EMS                 | recessive |
| <i>dye1-1</i>                           | Rice ( <i>Oryza sativa</i> )                             | T-DNA               | recessive |
| <i>els4</i>                             | Rice ( <i>Oryza sativa</i> )                             | T-DNA               | recessive |
| <i>es7</i>                              | Rice ( <i>Oryza sativa</i> )                             | EMS                 | recessive |
| <i>ES7_Cas9</i>                         | Rice ( <i>Oryza sativa</i> )                             | CRISPR              | recessive |
| <i>FE047( CYP94C2box)</i>               | Rice ( <i>Oryza sativa</i> )                             |                     |           |
| <i>Ghd2OE</i>                           | Rice ( <i>Oryza sativa</i> )                             | Transgene           | dominant  |
| <i>gnt1</i>                             | Rice ( <i>Oryza sativa</i> )                             | T-DNA               | recessive |

|                              |                              |               |           |
|------------------------------|------------------------------|---------------|-----------|
| <i>gogat1</i>                | Rice ( <i>Oryza sativa</i> ) | T-DNA         | recessive |
| <i>Ga-null mutant (DK22)</i> | Rice ( <i>Oryza sativa</i> ) | T-DNA         | recessive |
| <i>LTS1</i>                  | Rice ( <i>Oryza sativa</i> ) | T-DNA         | recessive |
| <i>mhz7-1</i>                | Rice ( <i>Oryza sativa</i> ) | EMS           | recessive |
| <i>noe1</i>                  | Rice ( <i>Oryza sativa</i> ) | T-DNA         | recessive |
| <i>OsAHP1-RNAi</i>           | Rice ( <i>Oryza sativa</i> ) | RNAi          | recessive |
| <i>OsAHP2-RNAi</i>           | Rice ( <i>Oryza sativa</i> ) | RNAi          | recessive |
| <i>osakalphagal</i>          | Rice ( <i>Oryza sativa</i> ) | EMS           | recessive |
| <i>Osatg7-1</i>              | Rice ( <i>Oryza sativa</i> ) | T-DNA         | recessive |
| <i>OsCDC48:YFP</i>           | Rice ( <i>Oryza sativa</i> ) | Transgene     | dominant  |
| <i>oscoi1b-1</i>             | Rice ( <i>Oryza sativa</i> ) | T-DNA         | recessive |
| <i>OsDOSOE</i>               | Rice ( <i>Oryza sativa</i> ) | Transgene     | dominant  |
| <i>OsDOS_RNAi</i>            | Rice ( <i>Oryza sativa</i> ) | RNAi          | recessive |
| <i>oself3.1</i>              | Rice ( <i>Oryza sativa</i> ) | T-DNA         | recessive |
| <i>OsFBK12 RNAi</i>          | Rice ( <i>Oryza sativa</i> ) | RNAi          | recessive |
| <i>OsGDCH-RNAi</i>           | Rice ( <i>Oryza sativa</i> ) | RNAi          | recessive |
| <i>oshcar</i>                | Rice ( <i>Oryza sativa</i> ) | T-DNA         | recessive |
| <i>OsHOX33RNAi</i>           | Rice ( <i>Oryza sativa</i> ) | RNAi          | recessive |
| <i>OsLOX2OE</i>              | Rice ( <i>Oryza sativa</i> ) | Transgene     | dominant  |
| <i>OsLOX2RNAi</i>            | Rice ( <i>Oryza sativa</i> ) | RNAi          | recessive |
| <i>OsNAC2-RNAi</i>           | Rice ( <i>Oryza sativa</i> ) | RNAi          | recessive |
| <i>OsPIL1-OX</i>             | Rice ( <i>Oryza sativa</i> ) | Transgene     | dominant  |
| <i>ospls1</i>                | Rice ( <i>Oryza sativa</i> ) | T-DNA         | recessive |
| <i>OsRab7B3OX</i>            | Rice ( <i>Oryza sativa</i> ) | Transgene     | dominant  |
| <i>Ossik2</i>                | Rice ( <i>Oryza sativa</i> ) | T-DNA         | recessive |
| <i>OsSIK2ox</i>              | Rice ( <i>Oryza sativa</i> ) | Transgene     | dominant  |
| <i>OsSWEET15ox</i>           | Rice ( <i>Oryza sativa</i> ) | Transgene     | dominant  |
| <i>OsTDC1OE</i>              | Rice ( <i>Oryza sativa</i> ) | Transgene     | dominant  |
| <i>OsTDC1_RNAi</i>           | Rice ( <i>Oryza sativa</i> ) | RNAi          | recessive |
| <i>OsTZF1-RNAi</i>           | Rice ( <i>Oryza sativa</i> ) | Transgene     | recessive |
| <i>OsTZF1ox</i>              | Rice ( <i>Oryza sativa</i> ) | Transgene     | dominant  |
| <i>OsWRKY42-GFP</i>          | Rice ( <i>Oryza sativa</i> ) | Transgene     | dominant  |
| <i>OsWRKY42OX</i>            | Rice ( <i>Oryza sativa</i> ) | Transgene     | dominant  |
| <i>OsY37</i>                 | Rice ( <i>Oryza sativa</i> ) | T-DNA         | recessive |
| <i>pls3</i>                  | Rice ( <i>Oryza sativa</i> ) | T-DNA         | recessive |
| <i>PME1ox</i>                | Rice ( <i>Oryza sativa</i> ) | Transgene     | dominant  |
| <i>PME1_RNAi</i>             | Rice ( <i>Oryza sativa</i> ) | RNAi          | recessive |
| <i>ps1-D</i>                 | Rice ( <i>Oryza sativa</i> ) | Transgene     | dominant  |
| <i>psd128</i>                | Rice ( <i>Oryza sativa</i> ) | EMS           | recessive |
| <i>pUbi::SPL33</i>           | Rice ( <i>Oryza sativa</i> ) | Transgene     | dominant  |
| <i>rls1</i>                  | Rice ( <i>Oryza sativa</i> ) | $\gamma$ -ray | recessive |
| <i>rls3</i>                  | Rice ( <i>Oryza sativa</i> ) | T-DNA         | recessive |
| <i>RNAiOsAPX4</i>            | Rice ( <i>Oryza sativa</i> ) | Transgene     | dominant  |
| <i>SHTox</i>                 | Rice ( <i>Oryza sativa</i> ) | Transgene     | dominant  |

|                          |                                             |                |           |
|--------------------------|---------------------------------------------|----------------|-----------|
| <i>sles</i>              | Rice ( <i>Oryza sativa</i> )                | T-DNA          | recessive |
| <i>spl29</i>             | Rice ( <i>Oryza sativa</i> )                | EMS            | recessive |
| <i>spl3</i>              | Rice ( <i>Oryza sativa</i> )                | EMS            | recessive |
| <i>spl32</i>             | Rice ( <i>Oryza sativa</i> )                | EMS            | recessive |
| <i>spl33</i>             | Rice ( <i>Oryza sativa</i> )                | EMS            | recessive |
| <i>UbiP-OsAkalphaGal</i> | Rice ( <i>Oryza sativa</i> )                | Overexpression | dominant  |
| <i>ASR1_RNAi</i>         | Tobacco ( <i>Nicotiana tabacum</i> )        | RNAi           | recessive |
| <i>OsSgr-GFP</i>         | Rice ( <i>Oryza sativa</i> )                | Transgene      | dominant  |
| <i>35S::BpMADS4</i>      | Silver birch ( <i>Betula pendula Roth</i> ) | Transgene      | dominant  |
| <i>SIDREB3ox</i>         | Tomato ( <i>Solanum lycopersicum</i> )      | Transgene      | dominant  |
| <i>35S::GmNAC065-GFP</i> | Soybean ( <i>Glycine max</i> )              | Transgene      | dominant  |
| <i>35S::GmNAC085-GFP</i> | Soybean ( <i>Glycine max</i> )              | Transgene      | dominant  |
| <i>CRY2ox</i>            | Soybean ( <i>Glycine max</i> )              | Transgene      | dominant  |
| <i>CRY2RNAi</i>          | Soybean ( <i>Glycine max</i> )              | RNAi           | recessive |
| <i>GmCIB1ox</i>          | Soybean ( <i>Glycine max</i> )              | Transgene      | dominant  |
| <i>GmSARK_RNAi</i>       | Soybean ( <i>Glycine max</i> )              | RNAi           | recessive |
| <i>35S::BiP</i>          | soybean( <i>Glycine max</i> )               | Transgene      | dominant  |
| <i>35S : HaHSFA4a</i>    | Sunflower ( <i>Helianthus annuus</i> )      | Transgene      | dominant  |
| <i>35S : HaHSFA9</i>     | Sunflower ( <i>Helianthus annuus</i> )      | Transgene      | dominant  |
| <i>IbNAC1ox</i>          | Sweet potato                                | Transgene      | dominant  |
| <i>35S::CsHis</i>        | Tea ( <i>Camellia sinensis</i> )            | Transgene      | dominant  |
| <i>SAG12:Cin1</i>        | Tobacco ( <i>Nicotiana tabacum</i> )        | Transgene      | dominant  |
| <i>TetR:Cin1</i>         | Tobacco ( <i>Nicotiana tabacum</i> )        | Transgene      | dominant  |
| <i>NtNAC080CRISPR</i>    | Tobacco ( <i>Nicotiana tabacum</i> )        | CRISPR         | recessive |
| <i>NtNAC080OE</i>        | Tobacco ( <i>Nicotiana tabacum</i> )        | Transgene      | dominant  |
| <i>ODC-RNAi</i>          | Tobacco ( <i>Nicotiana tabacum</i> )        | RNAi           | recessive |
| <i>SAG:kn1</i>           | tobacco( <i>Nicotiana tabacum</i> )         | Transgene      | dominant  |
| <i>35S:FYFL</i>          | Tomato ( <i>Solanum lycopersicum</i> )      | Transgene      | dominant  |
| <i>OGDH_RNAi</i>         | Tomato ( <i>Solanum lycopersicum</i> )      | RNAi           | recessive |
| <i>35S:SIERF36</i>       | Tomato ( <i>Solanum lycopersicum</i> )      | Transgene      | dominant  |
| <i>SIELP2L-RNAi</i>      | Tomato ( <i>Solanum lycopersicum</i> )      | RNAi           | recessive |
| <i>SIERF36ΔEAR</i>       | Tomato ( <i>Solanum lycopersicum</i> )      | Transgene      | dominant  |
| <i>SINAP2-KD</i>         | Tomato ( <i>Solanum lycopersicum</i> )      | Transgene      | recessive |
| <i>SINAP2-OX</i>         | Tomato ( <i>Solanum lycopersicum</i> )      | Transgene      | dominant  |
| <i>SIORIS02-KD</i>       | Tomato ( <i>Solanum lycopersicum</i> )      | Transgene      | dominant  |
| <i>SIEBF1_RNAi</i>       | Tomato ( <i>Solanum lycopersicum</i> )      | RNAi           | recessive |
| <i>SIEBF2_RNAi</i>       | Tomato ( <i>Solanum lycopersicum</i> )      | RNAi           | recessive |
| <i>INVINH1 RNAi</i>      | Tomato ( <i>Solanum lycopersicum</i> )      | RNAi           | recessive |
| <i>dad1-1</i>            | Petunia ( <i>Petunia hybrida</i> )          | Transposon     | recessive |
| <i>dad1-2</i>            | Petunia ( <i>Petunia hybrida</i> )          | Transposon     | recessive |
| <i>Lr34</i>              | wheat ( <i>Triticum aestivum</i> )          | other          | recessive |
| <i>BSMV:TaSCL14</i>      | Wheat ( <i>Triticum aestivum</i> )          | Transgene      | dominant  |
| <i>NtNAM-B1_RNAi</i>     | <i>Nicotiana tabacum</i>                    | RNAi           | recessive |
| <i>abi5-1</i>            | <i>Arabidopsis thaliana</i>                 | T-DNA          | recessive |

|                      |                             |                |           |
|----------------------|-----------------------------|----------------|-----------|
| <i>AGL15OE</i>       | <i>Arabidopsis thaliana</i> | Transgene      | dominant  |
| <i>apg7-1</i>        | <i>Arabidopsis thaliana</i> | T-DNA          | recessive |
| <i>arf1-4 dsARF2</i> | <i>Arabidopsis thaliana</i> | T-DNA and RNAi | recessive |
| <i>atmyb2-1</i>      | <i>Arabidopsis thaliana</i> | T-DNA          | recessive |
| <i>atmyb2-2</i>      | <i>Arabidopsis thaliana</i> | T-DNA          | recessive |
| <i>drr1</i>          | <i>Arabidopsis thaliana</i> | T-DNA          | recessive |
| <i>dsARF2</i>        | <i>Arabidopsis thaliana</i> | RNAi           | recessive |
| <i>hmg1-1</i>        | <i>Arabidopsis thaliana</i> | T-DNA          | recessive |
| <i>miR164Aox</i>     | <i>Arabidopsis thaliana</i> | Transgene      | dominant  |
| <i>miR164Box</i>     | <i>Arabidopsis thaliana</i> | Transgene      | dominant  |
| <i>CBF2OE</i>        | <i>Arabidopsis thaliana</i> | Transgene      | dominant  |

---



**Supplementary Table S2.** List of the *SAGs* that delay leaf senescence in *Arabidopsis*.

| <b>Locus Name</b> | <b>Gene Name</b> | <b>Gene Description</b>                            |
|-------------------|------------------|----------------------------------------------------|
| AT3G59950         | ATG4B            | AUTOPHAGY 4b (ATG4b)                               |
| AT5G09300         | E1A2             | 2-oxoisovalerate dehydrogenase subunit alpha       |
| AT1G21400         | E1A1             | 2-oxoisovalerate dehydrogenase subunit alpha 1     |
| AT3G54840         | RABF1            | Ras-related protein 1(RABF1)                       |
| AT2G05630         | ATG8D            | AUTOPHAGY 8D(ATG8D)                                |
| AT4G00870         | BHLH14           | Basic helix-loop-helix 14 (BHLH14)                 |
| AT2G27840         | HDT4             | Histone deacetylase HDT4 (HDT4)                    |
| AT3G04030         | MYR2             | Homeodomain-like superfamily protein(MYR2)         |
| AT1G08620         | JMJ16            | Lysine-specific demethylase MJM16                  |
| AT5G64040         | PSAN             | Photosystem I reaction center subunit N (PSAN)     |
| AT5G09860         | THO1             | THO complex subunit 1 (THO1)                       |
| AT5G28840         | GME              | GDP-D-MANNOSE 3',5'-EPIMERASE (GME)                |
| AT1G52340         | ABA2             | ABA DEFICIENT 2 (ABA2)                             |
| AT2G46510         | AIB              | ABA-INDUCIBLE BHLH-TYPE TRANSCRIPTION FACTOR (AIB) |
| AT3G02480         | ABR              | ABA-RESPONSE PROTEIN (ABR)                         |
| AT5G64940         | ATH13            | ABC2 HOMOLOG 13 (ATH13)                            |
| AT4G37000         | ACD2             | ACCELERATED CELL DEATH 2 (ACD2)                    |
| AT3G51970         | ASAT1            | ACYL-COA STEROL ACYL TRANSFERASE 1 (ASAT1)         |
| AT5G13790         | AGL15            | AGAMOUS-LIKE 15 (AGL15)                            |
| AT2G45660         | AGL20            | AGAMOUS-LIKE 20 (AGL20)                            |
| AT5G62165         | AGL42            | AGAMOUS-LIKE 42 (AGL42)                            |
| AT4G20070         | AAH              | ALLANTOATE AMIDOHYDROLASE (AAH)                    |
| AT4G04955         | ALN              | ALLANTOINASE (ALN)                                 |
| AT4G36920         | AP2              | APETALA 2 (AP2)                                    |
| AT5G02760         | APD7             | ARABIDOPSIS PP2C CLADE D 7 (APD7)                  |
| AT1G20900         | AHL27            | AT-HOOK MOTIF NUCLEAR-LOCALIZED PROTEIN 27         |
| AT3G07525         | ATG10            | AUTOPHAGY 10 (ATG10)                               |
| AT1G54210         | ATG12A           | AUTOPHAGY 12 A (ATG12A)                            |
| AT3G62770         | ATG18a           | AUTOPHAGY 18A (ATG18a)                             |
| AT3G19190         | ATG2             | AUTOPHAGY 2 (ATG2)                                 |
| AT2G44140         | ATG4A            | AUTOPHAGY 4A (ATG4A)                               |
| AT5G17290         | APG5             | AUTOPHAGY 5 (APG5)                                 |
| AT3G61710         | ATG6             | AUTOPHAGY 6 (ATG6)                                 |
| AT5G45900         | APG7             | AUTOPHAGY 7 (APG7)                                 |
| AT4G21980         | APG8A            | AUTOPHAGY 8A (APG8A)                               |
| AT4G04620         | ATG8B            | AUTOPHAGY 8B (ATG8B)                               |
| AT1G62040         | ATG8C            | AUTOPHAGY 8C (ATG8C)                               |
| AT2G45170         | ATG8E            | AUTOPHAGY 8E (ATG8E)                               |
| AT4G16520         | ATG8F            | AUTOPHAGY 8F (ATG8F)                               |
| AT3G60640         | ATG8G            | AUTOPHAGY 8G (ATG8G)                               |
| AT3G15580         | APG8H            | AUTOPHAGY 8H (APG8H)                               |
| AT3G06420         | ATG8H            | AUTOPHAGY 8H (ATG8H)                               |

|           |         |                                                                  |
|-----------|---------|------------------------------------------------------------------|
| AT2G31260 | APG9    | AUTOPHAGY 9 (APG9)                                               |
| AT4G30790 | ATG11   | AUTOPHAGY-RELATED 11 (ATG11)                                     |
| AT2G38120 | AUX1    | AUXIN RESISTANT 1 (AUX1)                                         |
| AT4G31910 | BAT1    | BR-RELATED ACYLTRANSFERASE1 (BAT1)                               |
| AT4G25470 | CBF2    | C-REPEAT/DRE BINDING FACTOR 2 (CBF2)                             |
| AT5G27420 | CNI1    | CARBON/NITROGEN INSENSITIVE 1 (CNI1)                             |
| AT4G35090 | CAT2    | CATALASE 2 (CAT2)                                                |
| AT2G38170 | CAX1    | CATION EXCHANGER 1 (CAX1)                                        |
| AT3G51860 | CAX3    | CATION EXCHANGER 3 (CAX3)                                        |
| AT1G44446 | CH1     | CHLORINA 1 (CH1)                                                 |
| AT2G42530 | COR15B  | COLD REGULATED 15B (COR15B)                                      |
| AT2G42540 | COR15A  | COLD-REGULATED 15A (COR15A)                                      |
| AT1G11680 | CYP51G1 | CYTOCHROME P450 51G1 (CYP51G1)                                   |
| AT2G39770 | CYT1    | CYTOKINESIS DEFECTIVE 1 (CYT1)                                   |
| AT4G36400 | D2HGDH  | D-2-HYDROXYGLUTARATE DEHYDROGENASE (D2HGDH)                      |
| AT5G15410 | DND1    | DEFENSE NO DEATH 1 (DND1)                                        |
| AT4G10500 | DLO1    | DMR6-LIKE OXYGENASE 1 (DLO1)                                     |
| AT2G25930 | ELF3    | EARLY FLOWERING 3 (ELF3)                                         |
| AT2G40080 | ELF4    | EARLY FLOWERING 4 (ELF4)                                         |
| AT2G43400 | ETFQO   | ELECTRON-TRANSFER FLAVOPROTEIN:UBIQUINONE OXIDOREDUCTASE (ETFQO) |
| AT5G09900 | EMB2107 | EMBRYO DEFECTIVE 2107 (EMB2107)                                  |
| AT1G08720 | EDR1    | ENHANCED DISEASE RESISTANCE 1 (EDR1)                             |
| AT1G54040 | ESP     | EPITHIOSPECIFIER PROTEIN (ESP)                                   |
| AT1G66340 | ETR1    | ETHYLENE RESPONSE 1 (ETR1)                                       |
| AT3G23150 | ETR2    | ETHYLENE RESPONSE 2 (ETR2)                                       |
| AT2G40940 | ERS1    | ETHYLENE RESPONSE SENSOR 1 (ERS1)                                |
| AT3G22170 | fhv3    | FAR-RED ELONGATED HYPOCOTYLS 3 (fhv3)                            |
| AT4G15090 | FAR1    | FAR-RED IMPAIRED RESPONSE 1 (FAR1)                               |
| AT5G01600 | FER1    | FERRETIN 1 (FER1)                                                |
| AT5G10140 | FLC     | FLOWERING LOCUS C (FLC)                                          |
| AT4G00650 | FRI     | FRIGIDA (FRI)                                                    |
| AT2G26140 | ftsh4   | FTSH PROTEASE 4 (ftsh4)                                          |
| AT1G03160 | FZL     | FZO-LIKE (FZL)                                                   |
| AT2G20570 | GPR11   | GBF'S PRO-RICH REGION-INTERACTING FACTOR 1 (GPR11)               |
| AT1G14920 | GAI     | GIBBERELIC ACID INSENSITIVE (GAI)                                |
| AT3G54660 | GR      | GLUTATHIONE REDUCTASE (GR)                                       |
| AT3G14420 | GOX1    | GLYCOLATE OXIDASE 1 (GOX1)                                       |
| AT3G14415 | GOX2    | GLYCOLATE OXIDASE 2 (GOX2)                                       |
| AT5G44190 | GLK2    | GOLDEN2-LIKE 2 (GLK2)                                            |
| AT3G13960 | GRF5    | GROWTH-REGULATING FACTOR 5 (GRF5)                                |
| AT4G34460 | AGB1    | GTP BINDING PROTEIN BETA 1 (AGB1)                                |
| AT5G35750 | HK2     | HISTIDINE KINASE 2 (HK2)                                         |
| AT1G27320 | HK3     | HISTIDINE KINASE 3 (HK3)                                         |

|           |         |                                                   |
|-----------|---------|---------------------------------------------------|
| AT1G76490 | HMG1    | HYDROXY METHYLGLUTARYL COA REDUCTASE 1 (HMG1)     |
| AT3G45300 | IVD     | ISOVALERYL-COA-DEHYDROGENASE (IVD)                |
| AT1G01260 | JAM2    | JASMONATE ASSOCIATED MYC2 LIKE 2 (JAM2)           |
| AT4G16430 | JAM3    | JASMONATE ASSOCIATED MYC2 LIKE 3 (JAM3)           |
| AT1G11755 | LEW1    | LEAF WILTING 1 (LEW1)                             |
| AT5G52300 | LTI65   | LOW-TEMPERATURE-INDUCED 65 (LTI65)                |
| AT5G52310 | LTI78   | LOW-TEMPERATURE-INDUCED 78 (LTI78)                |
| AT1G70170 | MMP     | MATRIX METALLOPROTEINASE (MMP)                    |
| AT2G47585 | MIR164A | MICRORNA164A (MIR164A)                            |
| AT5G01747 | MIR164B | MICRORNA164B (MIR164B)                            |
| AT5G27807 | MIR164C | MICRORNA164C (MIR164C)                            |
| AT4G23713 | MIR319A | MICRORNA319A (MIR319A)                            |
| AT5G49880 | MAD1    | MITOTIC ARREST DEFICIENT 1 (MAD1)                 |
| AT5G67300 | MYBR1   | MYB DOMAIN PROTEIN R1 (MYBR1)                     |
| AT1G34190 | NAC017  | NAC DOMAIN CONTAINING PROTEIN 17 (NAC017)         |
| AT5G09330 | NAC082  | NAC DOMAIN CONTAINING PROTEIN 82 (NAC082)         |
| AT5G13180 | NAC083  | NAC DOMAIN CONTAINING PROTEIN 83 (NAC083)         |
| AT5G22380 | NAC090  | NAC DOMAIN CONTAINING PROTEIN 90 (NAC090)         |
| AT1G02860 | NLA     | NITROGEN LIMITATION ADAPTATION (NLA)              |
| AT3G47450 | NOA1    | NO ASSOCIATED 1 (NOA1)                            |
| AT4G11910 | NYE2    | NONYELLOWING 2 (NYE2)                             |
| AT1G32450 | NPF7.3  | NRT1/ PTR FAMILY 7.3 (NPF7.3)                     |
| AT4G14880 | OASA1   | O-ACETYL SERINE (THIOL) LYASE (OAS-TL) ISOFORM A1 |
| AT1G31040 | ORE15   | ORESARA15 (ORE15)                                 |
| AT1G04010 | PSAT1   | PHOSPHOLIPID STEROL ACYL TRANSFERASE 1 (PSAT1)    |
| AT4G12800 | PSAL    | PHOTOSYSTEM I SUBUNIT L (PSAL)                    |
| AT1G09570 | PHYA    | PHYTOCHROME A (PHYA)                              |
| AT2G18790 | PHYB    | PHYTOCHROME B (PHYB)                              |
| AT3G46640 | PCL1    | PHYTOCLOCK 1 (PCL1)                               |
| AT2G28830 | PUB12   | PLANT U-BOX 12 (PUB12)                            |
| AT3G46510 | PUB13   | PLANT U-BOX 13 (PUB13)                            |
| AT2G23140 | PUB4    | PLANT U-BOX 4 (PUB4)                              |
| AT4G22750 | PAT13   | PROTEIN ACYLTRANSFERASE 13 (PAT13)                |
| AT3G60800 | PAT14   | PROTEIN ACYLTRANSFERASE 14 (PAT14)                |
| AT5G34850 | PAP26   | PURPLE ACID PHOSPHATASE 26 (PAP26)                |
| AT5G50210 | QS      | QUINOLINATE SYNTHASE (QS)                         |
| AT1G32230 | RCD1    | RADICAL-INDUCED CELL DEATH1 (RCD1)                |
| AT1G15290 | REC3    | REDUCED CHLOROPLAST COVERAGE 3 (REC3)             |
| AT1G01360 | RCAR1   | REGULATORY COMPONENT OF ABA RECEPTOR 1 (RCAR1)    |
| AT4G38630 | RPN10   | REGULATORY PARTICLE NON-ATPASE 10 (RPN10)         |
| AT5G64760 | RPN5B   | REGULATORY PARTICLE NON-ATPASE SUBUNIT 5B (RPN5B) |
| AT2G01570 | RGA1    | REPRESSOR OF GA1-3 1 (RGA1)                       |
| AT4G16110 | RR2     | RESPONSE REGULATOR 2 (RR2)                        |
| AT1G59940 | ARR3    | RESPONSE REGULATOR 3 (ARR3)                       |

|           |          |                                                                            |
|-----------|----------|----------------------------------------------------------------------------|
| AT2G41310 | RR3      | RESPONSE REGULATOR 3 (RR3)                                                 |
| AT1G10470 | ARR4     | RESPONSE REGULATOR 4 (ARR4)                                                |
| AT3G48100 | RR5      | RESPONSE REGULATOR 5 (RR5)                                                 |
| AT5G62920 | ARR6     | RESPONSE REGULATOR 6 (ARR6)                                                |
| AT1G19050 | ARR7     | RESPONSE REGULATOR 7 (ARR7)                                                |
| AT3G57040 | ARR9     | RESPONSE REGULATOR 9 (ARR9)                                                |
| AT1G66350 | RGL1     | RGA-LIKE 1 (RGL1)                                                          |
| AT3G03450 | RGL2     | RGA-LIKE 2 (RGL2)                                                          |
| AT5G17490 | RGL3     | RGA-LIKE PROTEIN 3 (RGL3)                                                  |
| AT3G07700 | SIA1     | SALT-INDUCED ABC1 KINASE 1 (SIA1)                                          |
| AT1G20780 | SAUL1    | SENESCENCE-ASSOCIATED E3 UBIQUITIN LIGASE 1 (SAUL1)                        |
| AT5G01820 | SR1      | SERINE/THREONINE PROTEIN KINASE 1 (SR1)                                    |
| AT5G39510 | SGR4     | SHOOT GRAVITROPSIM 4 (SGR4)                                                |
| AT5G37890 | SINAL7   | SINA LIKE 7 (SINAL7)                                                       |
| AT3G01090 | KIN10    | SNF1 KINASE HOMOLOG 10 (KIN10)                                             |
| AT3G19220 | SCO2     | SNOWY COTYLEDON 2 (SCO2)                                                   |
| AT5G01920 | STN8     | STATE TRANSITION 8 (STN8)                                                  |
| AT1G68830 | STN7     | STT7 HOMOLOG STN7 (STN7)                                                   |
| AT1G67140 | SWEETIE  | SWEETIE (SWEETIE)                                                          |
| AT4G09010 | TL29     | THYLAKOID LUMEN 29 (TL29)                                                  |
| AT2G24820 | TIC55-II | TRANSLOCON AT THE INNER ENVELOPE MEMBRANE OF CHLOROPLASTS 55-II (TIC55-II) |
| AT4G12570 | UPL5     | UBIQUITIN PROTEIN LIGASE 5 (UPL5)                                          |
| AT1G60490 | VPS34    | VACUOLAR PROTEIN SORTING 34 (VPS34)                                        |
| AT1G26670 | VTI1B    | VESICLE TRANSPORT V-SNARE 1B (VTI1B)                                       |
| AT2G17790 | VPS35A   | VPS35 HOMOLOG A (VPS35A)                                                   |
| AT1G75850 | VPS35B   | VPS35 HOMOLOG B (VPS35B)                                                   |
| AT3G51310 | VPS35C   | VPS35 HOMOLOG C (VPS35C)                                                   |
| AT1G14410 | WHY1     | WHIRLY 1 (WHY1)                                                            |
| AT2G01830 | WOL      | WOODEN LEG (WOL)                                                           |
| AT2G40750 | WRKY54   | WRKY DNA-BINDING PROTEIN 54 (WRKY54)                                       |
| AT1G69310 | WRKY57   | WRKY DNA-BINDING PROTEIN 57 (WRKY57)                                       |
| AT3G56400 | WRKY70   | WRKY DNA-BINDING PROTEIN 70 (WRKY70)                                       |
| AT4G34900 | XDH2     | XANTHINE DEHYDROGENASE 2 (XDH2)                                            |
| AT4G34890 | XDH1     | XANTHINE DEHYDROGENASE 1 (XDH1)                                            |
| AT5G25620 | YUCA6    | YUCCA6 (YUCA6)                                                             |

---

**Supplementary Table S3.** List of the *SAGs* that promote leaf senescence in *Arabidopsis*.

| Locus Name | Gene Name      | Gene Description                                                        |
|------------|----------------|-------------------------------------------------------------------------|
| AT4G19890  | <i>AtS40-3</i> | Senescence-associated gene S40-3, a homolog of barley HvS40             |
| AT2G20920  | <i>CRS</i>     | Cell Growth Defect factor 1-related gene Responsive to Senescence (CRS) |
| AT3G15010  | <i>UBA2C</i>   | UBP1-associated protein 2C                                              |
| AT4G28140  | <i>ERF054</i>  | Ethylene-responsive transcription factor ERF054                         |
| AT2G41060  | <i>UBA2B</i>   | UBP1-associated protein 2B                                              |
| AT1G66330  | <i>AAF</i>     | AAF - Senescence-associated protein AAF                                 |
| AT1G01720  | <i>ATAF1</i>   | NAC transcription factor (ATAF1)                                        |
| AT5G08790  | <i>ATAF2</i>   | NAC transcription factor (ATAF2)                                        |
| AT4G29100  | <i>BHLH68</i>  | Basic helix-loop-helix (bHLH) TF (BHLH68)                               |
| AT4G37790  | <i>HAT22</i>   | Homeobox protein HAT22 (HAT22)                                          |
| AT3G12130  | <i>KHZ1</i>    | CCCH zinc-finger TF (KHZ1)                                              |
| AT5G06770  | <i>KHZ2</i>    | CCCH zinc-finger TF (KHZ2)                                              |
| AT1G32080  | <i>LrgB</i>    | A homolog of the bacterial membrane protein LrgB (LrgB)                 |
| AT1G49010  | <i>MYBS1</i>   | R-R-type MYB-like Transcription Factor (MYBS1)                          |
| AT1G32640  | <i>MYC2</i>    | MYC-related transcriptional activator (MYC2)                            |
| AT5G46760  | <i>MYC3</i>    | MYC-related transcriptional activator (MYC3)                            |
| AT4G17880  | <i>MYC4</i>    | MYC-related transcriptional activator (MYC4)                            |
| AT3G27110  | <i>PGM48</i>   | Plastoglobuli (PG)-localized peptidase (PGM48)                          |
| AT2G23830  | <i>PVA31</i>   | VAMP-associated proteins (VAPs) (PVA31)                                 |
| AT4G23810  | <i>WRKY53</i>  | WRKY Transcription Factor (WRKY53)                                      |
| AT1G62300  | <i>WRKY6</i>   | WRKY Transcription Factor (WRKY6)                                       |
| AT1G58340  | <i>BCD1</i>    | BUSH-AND-CHLOROTIC-DWARF 1 (BCD1)                                       |
| AT2G21660  | <i>CCR2</i>    | COLD, CIRCADIAN RHYTHM, AND RNA BINDING 2 (CCR2)                        |
| AT1G01480  | <i>ACS2</i>    | 1-AMINO-CYCLOPROPANE-1-CARBOXYLATE SYNTHASE 2 (ACS2)                    |
| AT4G37770  | <i>ACS8</i>    | 1-AMINO-CYCLOPROPANE-1-CARBOXYLATE SYNTHASE 8 (ACS8)                    |
| AT4G08040  | <i>ACS11</i>   | 1-AMINOCYCLOPROPANE-1-CARBOXYLATE SYNTHASE 11 (ACS11)                   |
| AT2G22810  | <i>ACS4</i>    | 1-AMINOCYCLOPROPANE-1-CARBOXYLATE SYNTHASE 4 (ACS4)                     |
| AT3G49700  | <i>ACS9</i>    | 1-AMINOCYCLOPROPANE-1-CARBOXYLATE SYNTHASE 9 (ACS9)                     |
| AT4G11280  | <i>ACS6</i>    | 1-AMINOCYCLOPROPANE-1-CARBOXYLIC ACID SYNTHASE 6                        |
| AT5G48880  | <i>KAT5</i>    | 3-KETO-ACYL-COENZYME A THIOLASE 5 (KAT5)                                |
| AT1G04620  | <i>HCAR</i>    | 7-HYDROXYMETHYL CHLOROPHYLL A REDUCTASE (HCAR)                          |
| AT2G40220  | <i>ABI4</i>    | ABA INSENSITIVE 4 (ABI4)                                                |
| AT2G36270  | <i>ABI5</i>    | ABA INSENSITIVE 5 (ABI5)                                                |
| AT3G19290  | <i>ABF4</i>    | ABRE BINDING FACTOR 4 (ABF4)                                            |
| AT1G45249  | <i>ABF2</i>    | ABA RESPONSIVE ELEMENTS-BINDING FACTOR 2 (ABF2)                         |
| AT4G34000  | <i>ABF3</i>    | ABA RESPONSIVE ELEMENTS-BINDING FACTOR 3 (ABF3)                         |
| AT5G65800  | <i>ACS5</i>    | ACC SYNTHASE 5 (ACS5)                                                   |
| AT3G44880  | <i>ACD1</i>    | ACCELERATED CELL DEATH 1 (ACD1)                                         |
| AT4G24230  | <i>ACBP3</i>   | ACYL-COA-BINDING DOMAIN 3 (ACBP3)                                       |
| AT1G27450  | <i>APT1</i>    | ADENINE PHOSPHORIBOSYL TRANSFERASE 1 (APT1)                             |
| AT5G60910  | <i>AGL8</i>    | AGAMOUS-LIKE 8 (AGL8)                                                   |
| AT5G05700  | <i>ATE1</i>    | ARGININE-TRNA PROTEIN TRANSFERASE 1 (ATE1)                              |

|           |                |                                                         |
|-----------|----------------|---------------------------------------------------------|
| AT5G65010 | <i>ASN2</i>    | ASPARAGINE SYNTHETASE 2 (ASN2)                          |
| AT1G04250 | <i>AXR3</i>    | AUXIN RESISTANT 3 (AXR3)                                |
| AT1G59750 | <i>ARF1</i>    | AUXIN RESPONSE FACTOR 1 (ARF1)                          |
| AT1G19220 | <i>ARF19</i>   | AUXIN RESPONSE FACTOR 19 (ARF19)                        |
| AT5G62000 | <i>ARF2</i>    | AUXIN RESPONSE FACTOR 2 (ARF2)                          |
| AT5G41410 | <i>BEL1</i>    | BELL 1 (BEL1)                                           |
| AT3G63530 | <i>BB</i>      | BIG BROTHER (BB)                                        |
| AT4G39400 | <i>BRI1</i>    | BRASSINOSTEROID INSENSITIVE 1 (BRI1)                    |
| AT5G17860 | <i>CAX7</i>    | CALCIUM EXCHANGER 7 (CAX7)                              |
| AT5G37780 | <i>CAM1</i>    | CALMODULIN 1 (CAM1)                                     |
| AT1G66410 | <i>CAM4</i>    | CALMODULIN 4 (CAM4)                                     |
| AT1G54115 | <i>CCX4</i>    | CATION CALCIUM EXCHANGER 4 (CCX4)                       |
| AT5G37060 | <i>CHX24</i>   | CATION/H <sup>+</sup> EXCHANGER 24 (CHX24)              |
| AT3G62080 | <i>CHMP7</i>   | CHARGED MULTI-VESICULAR BODY PROTEIN 7 (CHMP7)          |
| AT5G66750 | <i>CHR1</i>    | CHROMATIN REMODELING 1 (CHR1)                           |
| AT2G44050 | <i>COS1</i>    | COI1 SUPPRESSOR1 (COS1)                                 |
| AT5G64930 | <i>CPR5</i>    | CONSTITUTIVE EXPRESSION OF PR GENES 5 (CPR5)            |
| AT5G03730 | <i>CTR1</i>    | CONSTITUTIVE TRIPLE RESPONSE 1 (CTR1)                   |
| AT3G50260 | <i>CEJ1</i>    | COOPERATIVELY REGULATED BY ETHYLENE AND JASMONATE 1     |
| AT4G34160 | <i>CYCD3;1</i> | CYCLIN D3;1 (CYCD3;1)                                   |
| AT3G50930 | <i>BCS1</i>    | CYTOCHROME BC1 SYNTHESIS (BCS1)                         |
| AT4G11140 | <i>CRF1</i>    | CYTOKININ RESPONSE FACTOR 1 (CRF1)                      |
| AT4G23750 | <i>CRF2</i>    | CYTOKININ RESPONSE FACTOR 2 (CRF2)                      |
| AT5G53290 | <i>CRF3</i>    | CYTOKININ RESPONSE FACTOR 3 (CRF3)                      |
| AT2G46310 | <i>CRF5</i>    | CYTOKININ RESPONSE FACTOR 5 (CRF5)                      |
| AT3G61630 | <i>CRF6</i>    | CYTOKININ RESPONSE FACTOR 6 (CRF6)                      |
| AT1G19270 | <i>DA1</i>     | DA (LARGE IN CHINESE) 1 (DA1)                           |
| AT2G38050 | <i>DET2</i>    | DE-ETIOLATED 2 (DET2)                                   |
| AT2G16390 | <i>DRD1</i>    | DEFECTIVE IN RNA-DIRECTED DNA METHYLATION 1 (DRD1)      |
| AT5G19700 | <i>ELS1</i>    | EARLY LEAF SENESCENCE 1 (ELS1)                          |
| AT1G80350 | <i>ERH3</i>    | ECTOPIC ROOT HAIR 3 (ERH3)                              |
| AT5G10360 | <i>EMB3010</i> | EMBRYO DEFECTIVE 3010 (EMB3010)                         |
| AT1G74710 | <i>EDS16</i>   | ENHANCED DISEASE SUSCEPTIBILITY TO ERYSIPIHE ORONTII 16 |
| AT5G03280 | <i>EIN2</i>    | ETHYLENE INSENSITIVE 2 (EIN2)                           |
| AT1G04310 | <i>ERS2</i>    | ETHYLENE RESPONSE SENSOR 2 (ERS2)                       |
| AT3G20770 | <i>EIN3</i>    | ETHYLENE-INSENSITIVE3 (EIN3)                            |
| AT2G27050 | <i>EIL1</i>    | ETHYLENE-INSENSITIVE3-LIKE 1 (EIL1)                     |
| AT5G64440 | <i>FAAH</i>    | FATTY ACID AMIDE HYDROLASE (FAAH)                       |
| AT1G65480 | <i>FT</i>      | FLOWERING LOCUS T (FT)                                  |
| AT5G15250 | <i>FTSH6</i>   | FTSH PROTEASE 6 (FTSH6)                                 |
| AT4G36730 | <i>GBF1</i>    | G-BOX BINDING FACTOR 1 (GBF1)                           |
| AT4G29130 | <i>HXK1</i>    | HEXOKINASE 1 (HXK1)                                     |
| AT5G59220 | <i>HAI1</i>    | HIGHLY ABA-INDUCED PP2C GENE 1 (HAI1)                   |
| AT5G63110 | <i>HDA6</i>    | HISTONE DEACETYLASE 6 (HDA6)                            |

|           |                 |                                                   |
|-----------|-----------------|---------------------------------------------------|
| AT3G44680 | <i>HDA9</i>     | HISTONE DEACETYLASE 9 (HDA9)                      |
| AT2G17265 | <i>HSK</i>      | HOMOSERINE KINASE (HSK)                           |
| AT2G34600 | <i>JAZ7</i>     | JASMONATE-ZIM-DOMAIN PROTEIN 7 (JAZ7)             |
| AT4G35890 | <i>LARP1C</i>   | LA RELATED PROTEIN 1C (LARP1C)                    |
| AT1G55020 | <i>LOX1</i>     | LIPOXYGENASE 1 (LOX1)                             |
| AT3G45140 | <i>LOX2</i>     | LIPOXYGENASE 2 (LOX2)                             |
| AT1G17420 | <i>LOX3</i>     | LIPOXYGENASE 3 (LOX3)                             |
| AT1G72520 | <i>LOX4</i>     | LIPOXYGENASE 4 (LOX4)                             |
| AT3G49940 | <i>LBD38</i>    | LOB DOMAIN-CONTAINING PROTEIN 38 (LBD38)          |
| AT2G43790 | <i>MPK6</i>     | MAP KINASE 6 (MPK6)                               |
| AT1G73500 | <i>MKK9</i>     | MAP KINASE KINASE 9 (MKK9)                        |
| AT1G05100 | <i>MAPKKK18</i> | MITOGEN-ACTIVATED PROTEIN KINASE KINASE KINASE 18 |
| AT2G42620 | <i>MAX2</i>     | MORE AXILLARY BRANCHES 2 (MAX2)                   |
| AT2G47190 | <i>MYB2</i>     | MYB DOMAIN PROTEIN 2 (MYB2)                       |
| AT5G47390 | <i>MYBH</i>     | MYB HYPOCOTYL ELONGATION-RELATED (MYBH)           |
| AT5G39610 | <i>NAC6</i>     | NAC DOMAIN CONTAINING PROTEIN 6 (NAC6)            |
| AT5G63790 | <i>NAC102</i>   | NAC DOMAIN CONTAINING PROTEIN 102 (NAC102)        |
| AT1G34180 | <i>NAC016</i>   | NAC DOMAIN CONTAINING PROTEIN 16 (NAC016)         |
| AT1G52890 | <i>NAC019</i>   | NAC DOMAIN CONTAINING PROTEIN 19 (NAC019)         |
| AT3G15500 | <i>NAC3</i>     | NAC DOMAIN CONTAINING PROTEIN 3 (NAC3)            |
| AT3G29035 | <i>NAC3</i>     | NAC DOMAIN CONTAINING PROTEIN 3 (NAC3)            |
| AT1G77450 | <i>NAC032</i>   | NAC DOMAIN CONTAINING PROTEIN 32 (NAC032)         |
| AT3G04060 | <i>NAC046</i>   | NAC DOMAIN CONTAINING PROTEIN 46 (NAC046)         |
| AT4G35580 | <i>NTL9</i>     | NAC TRANSCRIPTION FACTOR-LIKE 9 (NTL9)            |
| AT1G69490 | <i>NAP</i>      | NAC-LIKE, ACTIVATED BY AP3/PI (NAP)               |
| AT5G46830 | <i>NIG1</i>     | NACL-INDUCIBLE GENE 1 (NIG1)                      |
| AT4G13250 | <i>NYC1</i>     | NON-YELLOW COLORING 1 (NYC1)                      |
| AT4G22920 | <i>NYE1</i>     | NON-YELLOWING 1 (NYE1)                            |
| AT1G64280 | <i>NPR1</i>     | NONEXPRESSER OF PR GENES 1 (NPR1)                 |
| AT5G04900 | <i>NOL</i>      | NYC1-LIKE (NOL)                                   |
| AT4G33950 | <i>OST1</i>     | OPEN STOMATA 1 (OST1)                             |
| AT3G27930 | <i>OM47</i>     | OUTER MEMBRANE 47 (OM47)                          |
| AT3G49110 | <i>PRXCA</i>    | PEROXIDASE CA (PRXCA)                             |
| AT3G49120 | <i>PRXCB</i>    | PEROXIDASE CB (PRXCB)                             |
| AT2G33150 | <i>PKT3</i>     | PEROXISOMAL 3-KETOACYL-COA THIOLASE 3 (PKT3)      |
| AT5G13800 | <i>PPH</i>      | PHEOPHYTINASE (PPH)                               |
| AT2G32830 | <i>PHT1;5</i>   | PHOSPHATE TRANSPORTER 1;5 (PHT1;5)                |
| AT3G52430 | <i>PAD4</i>     | PHYTOALEXIN DEFICIENT 4 (PAD4)                    |
| AT1G09530 | <i>PIF3</i>     | PHYTOCHROME INTERACTING FACTOR 3 (PIF3)           |
| AT2G20180 | <i>PIL5</i>     | PHYTOCHROME INTERACTING FACTOR 3-LIKE 5 (PIL5)    |
| AT3G59060 | <i>PIL6</i>     | PHYTOCHROME INTERACTING FACTOR 3-LIKE 6 (PIL6)    |
| AT2G43010 | <i>PIF4</i>     | PHYTOCHROME INTERACTING FACTOR 4 (PIF4)           |
| AT3G52250 | <i>PWR</i>      | POWERDRESS (PWR)                                  |
| AT2G46790 | <i>PRR9</i>     | PSEUDO-RESPONSE REGULATOR 9 (PRR9)                |

|           |                |                                                                      |
|-----------|----------------|----------------------------------------------------------------------|
| AT5G46790 | <i>PYL1</i>    | PYR1-LIKE 1 (PYL1)                                                   |
| AT4G27920 | <i>PYL10</i>   | PYR1-LIKE 10 (PYL10)                                                 |
| AT5G45860 | <i>PYL11</i>   | PYR1-LIKE 11 (PYL11)                                                 |
| AT5G45870 | <i>PYL12</i>   | PYR1-LIKE 12 (PYL12)                                                 |
| AT2G26040 | <i>PYL2</i>    | PYR1-LIKE 2 (PYL2)                                                   |
| AT1G73000 | <i>PYL3</i>    | PYR1-LIKE 3 (PYL3)                                                   |
| AT2G38310 | <i>PYL4</i>    | PYR1-LIKE 4 (PYL4)                                                   |
| AT4G01026 | <i>PYL7</i>    | PYR1-LIKE 7 (PYL7)                                                   |
| AT4G17870 | <i>PYR1</i>    | PYRABACTIN RESISTANCE 1 (PYR1)                                       |
| AT5G05440 | <i>PYL5</i>    | PYRABACTIN RESISTANCE 1-LIKE 5 (PYL5)                                |
| AT4G15530 | <i>PPDK</i>    | PYRUVATE ORTHOPHOSPHATE DIKINASE (PPDK)                              |
| AT1G22740 | <i>RABG3B</i>  | RAB GTPASE HOMOLOG G3B (RABG3B)                                      |
| AT1G69270 | <i>RPK1</i>    | RECEPTOR-LIKE PROTEIN KINASE 1 (RPK1)                                |
| AT4G34410 | <i>RRTF1</i>   | REDOX RESPONSIVE TRANSCRIPTION FACTOR 1 (RRTF1)                      |
| AT1G01360 | <i>RCAR1</i>   | REGULATORY COMPONENT OF ABA RECEPTOR 1 (RCAR1)                       |
| AT5G53160 | <i>RCAR3</i>   | REGULATORY COMPONENTS OF ABA RECEPTOR 3 (RCAR3)                      |
| AT1G13260 | <i>RAV1</i>    | RELATED TO ABI3/VP1 1 (RAV1)                                         |
| AT1G64060 | <i>RBOH F</i>  | RESPIRATORY BURST OXIDASE PROTEIN F (RBOH F)                         |
| AT4G27410 | <i>RD26</i>    | RESPONSIVE TO DESICCATION 26 (RD26)                                  |
| AT5G60690 | <i>REV</i>     | REVOLUTA (REV)                                                       |
| AT1G79850 | <i>RPS17</i>   | RIBOSOMAL PROTEIN S17 (RPS17)                                        |
| AT4G31700 | <i>RPS6</i>    | RIBOSOMAL PROTEIN S6 (RPS6)                                          |
| AT5G14930 | <i>SAG101</i>  | SENESCENCE-ASSOCIATED GENE 101 (SAG101)                              |
| AT5G13170 | <i>SAG29</i>   | SENESCENCE-ASSOCIATED GENE 29 (SAG29)                                |
| AT4G30520 | <i>SARK</i>    | SENESCENCE-ASSOCIATED RECEPTOR-LIKE KINASE (SARK)                    |
| AT2G45210 | <i>SAUR36</i>  | SMALL AUXIN UPREGULATED 36 (SAUR36)                                  |
| AT3G50500 | <i>SNRK2.2</i> | SNF1-RELATED PROTEIN KINASE 2.2 (SNRK2.2)                            |
| AT4G27330 | <i>SPL</i>     | SPOROCTELESS (SPL)                                                   |
| AT1G44000 | <i>SGRL</i>    | STAY-GREEN LIKE (SGRL)                                               |
| AT5G66880 | <i>SNRK2.3</i> | SUCROSE NONFERMENTING 1(SNF1)-RELATED PROTEIN KINASE 2.3 (SNRK2.3)   |
| AT1G50030 | <i>TOR</i>     | TARGET OF RAPAMYCIN (TOR)                                            |
| AT2G31070 | <i>tcp10</i>   | TCP DOMAIN PROTEIN 10 (tcp10)                                        |
| AT3G15030 | <i>TCP4</i>    | TCP FAMILY TRANSCRIPTION FACTOR 4 (TCP4)                             |
| AT4G18390 | <i>TCP2</i>    | TEOSINTE BRANCHED 1, CYCLOIDEA AND PCF TRANSCRIPTION FACTOR 2 (TCP2) |
| AT5G17690 | <i>TFL2</i>    | TERMINAL FLOWER 2 (TFL2)                                             |
| AT3G56860 | <i>UBA2A</i>   | UBP1-ASSOCIATED PROTEIN 2A (UBA2A)                                   |
| AT5G42270 | <i>VARI</i>    | VARIEGATED 1 (VAR1)                                                  |
| AT4G26850 | <i>VTC2</i>    | VITAMIN C DEFECTIVE 2 (VTC2)                                         |
| AT3G01970 | <i>WRKY45</i>  | WRKY DNA-BINDING PROTEIN 45 (WRKY45)                                 |
| AT5G13080 | <i>WRKY75</i>  | WRKY DNA-BINDING PROTEIN 75 (WRKY75)                                 |

---
